# Supplementary material for: Global organization of replication time zones of the mouse genome
Source: HighWire-hosted journal article supplement (doi:10.1101/gr.079566.108), 2008-07-30
Supplement: Supp_info_final.pdf [file Supp_info_final.pdf]

## Supplementary information

### Content

1. Supplementary methods.
2. Table 1 – Comparison with the literature.
3. Table 2 – GO analysis.
4. Figure S1 – autocorrelation analysis.
5. Figure S2 - Genome wide measurements of replication timing.
6. Figure S3 – Comparison between two analysis methods (TR50 and supervised clustering)
7. Figure S4 - Comparison between high and low resolution arrays.
8. Figure S5 – Gene Density and Giemsa Bands correlation to replication timing.
9. Figure S6 - Effect of shuffling the data on replication timing assignment
10. Figure S7 - FISH results.
11. Figure S8 – Genomic organization of the replication zones.
12. Figure S9 – Runs length analysis
13. Figure S10 – Replication fork direction analysis.
14. Figure S11 – Correlation between replication timing and transcription.
15. Figure S12 – Correspondence between replication timing and average transcript level.
16. Figure S13 – Conservation in replication timing between human and mouse.
17. Figure S14 – Comparison between large replicons and replication time zones.
18. Figure S15 – Baby machine based synchronization.
19. Figure S16 - Assessment of BrdU incorporation.
20. Figure S17 - Assessment of BrdU immunoprecipitation specificity.
21. Figure S18 - Effect of shuffling the data on large replicons identification.
22. References

### Supplementary methods

#### Cell culture

Mouse L1210 lymphocytic leukemia cells (ATCC CCL219) were grown in CO<sub>2</sub>-independent L-15 medium supplemented with 2 gr/L dextrose and 10% fetal bovine serum, penicillin G and streptomycin sulfate.

#### Baby machine based synchronization

Newborn cells were isolated from the baby machine device as previously described<sup>1</sup>. Briefly, after the apparatus that contains the funnel, a 0.22  $\mu$ m pore size nitrocellulose membrane, gaskets and a ring was prepared, the membrane was rinsed with a solution of concavalin A (20  $\mu$ g/ml) to allow the attachment of the cells to it, and residual conA was washed by PBS (100ml). A culture of L1210 cells ( $6 \times 10^7$ ) pulse labeled with 1 $\mu$ M BrdU for 45 min was poured on top of the filter, and the medium was drawn through by vacuum at about 1 ml/s. The filter holder was then inverted and placed on top of a second plastic funnel resting on a ring stand and connected to a peristaltic pump. The medium was pumped at a rate of 15 ml/min for the first 2 min to remove loosely attached cells and 2 ml/min thereafter. The entire procedure was performed in a 37°C incubator. Samples were collected every 45 minutes after a lag of 1 hour and 30 minutes. Synchronization of the cells isolated from the “baby machine” was assessed using a ZB Coulter electronic particle counter and flow cytometry (Figure S15). BrdU incorporation was assessed using a quantitative dot

blotting method <sup>2</sup> (Figure S16). Based on this analysis we excluded sample 8 from further experiments since it contained minimal amounts of BrdU.

#### Newly replicated DNA immunoprecipitation

Immunoprecipitation of BrdU-labeled DNA was carried out as described<sup>3</sup> with some modifications. DNA from each fraction was extracted, sonicated (2 cycles for 15 s) to generate fragments of an average size of 700 bp and heat denatured (3 min at 95<sup>0</sup>c). Immunoprecipitation was performed in a 10mM sodium phosphate (pH 7.0) 0.14 M NaCl, 0.05% Triton X-100 buffer using 2µg of anti-BrdU monoclonal antibody (347580, Becton-Dickinson) at room temperature for 30 min with constant end over end rotation. Antibody-bound BrdU DNA was precipitated by addition of 20ul Protein A/G Plus Agarose beads (Santa Cruz) and incubated at 4<sup>0</sup>c for 1 hour with constant rotation. Samples were washed in Lysis buffer (1M NaCl, 10mM EDTA, 50mM Tris-HCl (pH 8.0), 0.5%SDS ) two times, then in wash buffer (10 mM Tris-HCl pH 8.0, 250 mM LiCl, 0.5% NP40, 0.5% Na-deoxycholate, 1 mM EDTA) two times and lastly with TE. Pellets were resuspended in 200 µl elution buffer (50 mM Tris-HCl (pH 8.0), 10 mM EDTA, 0.5%SDS, 0.25 mg/ml proteinase K) and incubated overnight at 37<sup>0</sup>c. An additional 100 µl of the same elution buffer was added, and samples were incubated 1 hr at 50<sup>0</sup>c. 20µg of Glycogen was added, and the samples were extracted with phenol and chloroform and ethanol precipitated. The immunoprecipitated BrdU containing DNA was dissolved in 100 ul of Tris-HCl (pH 8.0) and stored in a dark box at -20<sup>0</sup>c. The specificity of the immunoprecipitation was assessed by mixing BrdU labeled mouse DNA with 6 fold excess of unlabeled human DNA. The relative amounts of mouse and human DNA were measured by semi quantitative PCR using species specific primers after immunoprecipitation. Almost no human DNA was detected after the immunoprecipitation (Figure S17).

#### Fluorescence *in situ* hybridization

ToR of selected regions was determined by performing FISH as described <sup>4, 5</sup>. Briefly, BAC DNA (purchased from BACPAC Resources Center in the CHORI) was labeled, mixed with 10µg of cot-I DNA (Life Technologies) and 10µg of mouse sonicated DNA and hybridized to L1210 nuclei. ToR was determined by the percentage of S phase nuclei with single/single, single/double and double/double patterns. The percentage was determined by counting at least 100 S phase nuclei for each probe.

#### BAC clones used in the FISH experiments:

| BAC clone   | Close to gene, region |
|-------------|-----------------------|
| RP23-340N9  | crisp1                |
| RP23-352F10 | adcy8                 |
| RP23-191C6  | a2m                   |
| RP24-338L20 | Chr16, 91.8M          |
| RP24-65P6   | Vax2                  |
| RP23-184H10 | Mark1                 |
| RP23-97O1   | actb                  |
| RP23-385F15 | Chr16, 88.3M          |
| RP24-122F10 | Atm                   |
| RP24-267F8  | Calmbp1/F13b          |
| RP24-85E12  | Psp                   |
| RP23-56C10  | Mgat5                 |

#### Replication fork direction determination

Replication fork direction was determined by using the protein synthesis inhibitor, emetine, which selectively inhibits lagging strand replication as described <sup>6</sup>. Briefly, L1210 cells were pulse labeled for 24 hours with 10uM BrdU and 2uM Emetine. BrdU-DNA was isolated by immunoprecipitation as described above. Strand specific DNA was amplified by 20 cycles of linear PCR (using a single primer) and the relative amount of the two strands was determined by semi quantitative PCR.

#### PCR amplification of replicated DNA

The sequences (5'->3') and the predicted product sizes of the primers used for PCR amplification are listed :

| Name                      | Forward sequence      | Reverse Sequence      | Product size |
|---------------------------|-----------------------|-----------------------|--------------|
| Beta -globin              | TGTGGGAAGATGGAAGAACC  | TATCAGCTTCCCCTCCTCCT  | 383bp        |
| Beta-actin                | TCGAGCCATAAAAGGCAACT  | CCATCGCCAAAACCTCTTCAT |              |
| X141 *                    | CATACTGACACTTGATGTCA  | TCAGCTAGGATCACTGACAA  | 330bp        |
| Mito DNA **               | GACATCTGGTTCTTACTTCA  | GTTTTTGGGGTTTGGCATT   | 180bp        |
|                           |                       |                       |              |
| Chr16-A                   | CAATCTGTGTGGCAATTTGG  | CCCAGAGGAGAGCAATGAAG  | 190bp        |
| Chr16-B                   | TGCAGTGTTGATTGGCTAGG  | GCACATGTTGTCAGGAGTGG  | 199bp        |
| Chr16-C                   | CACAGTTCCCATGACAAACG  | CCGAGGATTCTGTGTGGAGT  | 127bp        |
| Chr16-D                   | GACTGCAAGGGGACAATGTT  | TGTGGCTATGTCTGGCTGAG  | 105bp        |
| Chr1-40.372M <sup>§</sup> | GGTCCTGGAAGGTGACAGAA  | GTACCTGGGAACAGCCAGAA  | 120bp        |
| Chr1-40.379M <sup>§</sup> | AGTGGGCTGGGTTCTTACCT  | GCCAGGCAGGTCTTAGAGTG  | 171bp        |
| Chr1-40.381M <sup>§</sup> | GCCCTGTAGAATCCCCTCTC  | TACATGGGATCCACCAACCT  | 215bp        |
| Chr1-40.538M <sup>§</sup> | CCTGCCAGCTGTGTATAAT   | GTTCAATGCATGGGACAGTG  | 185bp        |
| Chr1-40.736M <sup>§</sup> | CCATTGTAAGCCTTGTGCCTA | CCCTCAGACTGCTGGTCTTC  | 151bp        |
| Chr1-40.859M <sup>§</sup> | CTCCTCAGGTTGCTTTTTC   | GTACAACGTGGGGAGAGGAA  | 210bp        |
| Chr1-41.07M <sup>§</sup>  | AGGCCAACATGACTTCAACC  | GCCTCAACATCCCAGACAAT  | 156bp        |
| Chr1-42.28M <sup>§</sup>  | TCTGGGATAGGCAAGGAATG  | CTGTGACTGCCTCTCACCAA  | 237bp        |
| Chr1-156.94M <sup>§</sup> | ACCTGTCTGTCCCATTTTGC  | AATGGCCCCTTCTGTTCTTT  | 157bp        |
| Chr1-156.97M <sup>§</sup> | GTTGCAAGGGCTCTGTCTTC  | GGCACTGAGAGGTCCAAGAG  | 178bp        |
| Chr1-157.3M <sup>§</sup>  | TCTTGCTATCGCTCCGTTTT  | CAAGAGCATCCAATGCAGAA  | 168bp        |
| Chr1-173.83M <sup>§</sup> | CATAAAGCCTGGAGGCTCAC  | ATAGACACCCACTGCCATGA  | 197bp        |
| Chr1-173.85M <sup>§</sup> | GGCTGGATCAGTCCAT      | TCACAGTGCACCTTCC      | 238bp        |
| Chr1-174.3M <sup>§</sup>  | TAGCACACAGCACCTTCCAG  | GTACCAGGGCAGGACAGAAA  | 178bp        |
| Chr1-174.4M <sup>§</sup>  | CCTTCACTGAGTTCCCTTCG  | GAAGCTGTTCTCCATGCTC   | 168bp        |
| Chr8-108.2M <sup>§</sup>  | TCCCGGTTGCTAGAAGCTAA  | TGTACTCTGCCATGCTCAGG  | 185bp        |
| Chr8-108.4M <sup>§</sup>  | TTTAGGGCCGTGTTAAGGTG  | TTATGCGCTCTGACAGGATG  | 194bp        |
| Chr8-108.7M <sup>§</sup>  | AACAGTCACCCTGTCCCAAG  | TCTGTGCCTGGATCTCTGTG  | 241bp        |

\* Mileham and Brown, Mammalian genome 7, 253-256, 1996.

\*\* Alla Buzina et al., NAR 33, 4412-4424, 2005.

<sup>§</sup> based on mm6 assembly.

PCR amplifications (30-32 cycles) included 0.125ul of Titanium Taq Polymerase (Clontech) and 2ul of antibody purified BrdU-labelled DNA or amplified BrdU-labeled DNA as a template (amplification didn't change the purified BrdU-labeled DNA content, data not shown) in 25ul standard reaction buffer .

X141 PCR reaction contained 1uM primers, all other reactions contained 0.5uM primers. PCR products were separated by electrophoresis on 2% agarose gels.

For replication fork direction determination the semiquantitative PCR was carried on the results of linear PCR reaction performed with a single primer. The linear amplification step allowed the specific amplification of a single strand and thus

retains the information about the differences in the abundance of the two strands. The linear amplification was carried out by performing 15-20 cycles of PCR with a single primer (either reverse or forward). The annealing temperature in those reactions was 65°C.

#### Amplification of DNA

Amplification of DNA for microarray hybridization was carried out as described<sup>7</sup> with some modifications. Briefly, in Round A, two rounds of DNA synthesis were performed using a partially degenerate primer (Primer A GTTTCCCAGTCACGATC NNNNNNNN), T7 sequenase and slow ramp times. Primer A concentration was calibrated to work best in 200uM. In Round B, 17-21 cycles of PCR were carried out using a primer (primer B GTTTCCCAGTCACGATC) that anneals to a specific region of primerA and unlabeled dNTPs. Samples were then cleaned in QIAGEN PCR purification kit and the amount of DNA was measured using a nano-drop device.

#### Labeling of DNA Hybridization to the Agilent mouse CGH microarrays

Labeling and Hybridization was carried out according to Agilent's CGH protocol ([www.embl-heidelberg.de/courses/Agilent05/CGH-Protocol.pdf](http://www.embl-heidelberg.de/courses/Agilent05/CGH-Protocol.pdf)). Briefly, 5ug from each sample were labeled using the BioPrime Array CGH Genomic Labeling Module. Reference samples were labeled in Cyanine 3-dUTP, and samples from the time course were labeled in Cyanine 5-dUTP. Hybridization was performed on Agilent mouse CGH 44k microarrays.

#### PolII ChIP on chip analysis

ChIP on chip was carried out as described<sup>8</sup>. Briefly, L1210 cells are fixed with 1% formaldehyde for 20 minutes at room temperature, harvested and rinsed with 1x PBS. The resultant cell pellet is sonicated, and DNA fragments that are crosslinked to a protein of interest are enriched by immunoprecipitation with 10µg of RNA polymerase II-specific antibody (8WG16 MMS-126R, COVANCE). After reversal of the crosslinking, both IP-enriched and unenriched DNA are amplified using ligation-mediated PCR (LM-PCR). 100ng of the amplified DNA is labeled with aminoallyl-dUTP, using high concentration Klenow polymerase, which is then coupled to one of two Cyanine dyes (Cy3 or Cy5), essentially as described<sup>9</sup>. Both IP-enriched and unenriched pools of labeled DNA are hybridized to a single DNA microarray containing 13,000 mouse intergenic regions (Mouse promoterChip BCBC-5A purchased from beta cell consortium). The ChIP on chip data were mode normalized and the average log ratios of two biological replicates was calculated. Genes were included in the set of 'bound' genes if the enrichment (average log<sub>2</sub> ratio) was at least 0.5 (FDR=0.1).

#### Dot-Blot analysis

Dot-blot analysis was carried out as described<sup>2</sup>. Briefly, concentration of BrdU-labeled DNA from each fraction was measured using the nano-drop device. The DNA (2 µg) was denatured by incubation with 10 volumes of 0.4 N NaOH solution for 30 min at room temperature and kept on ice to prevent annealing. The DNA solution was placed on ice and neutralized by an equal volume of 1M Tris·HCl (pH 6.8). Equal amounts of DNA (50 ng in 5 µl) was dot-blotted onto a nitrocellulose membrane (Schleicher & Schuell) and fixed by ultraviolet cross-linker Stratalinker (Stratagene). To visualize the BrdU signal, detection methods similar to Western blot analysis were



performed. Briefly, the membrane was incubated with mouse anti-BrdU monoclonal antibody (1:2,000 dilution, Becton-Dickinson) in TBST buffer (20 mM Tris·HCl, pH 7.6, 136 mM NaCl, and 0.05% Tween 20) containing 1% nonfat milk for 1 h at room temperature. After being washed with TBST (10 min x 3 times at room temperature), the membrane was incubated with a horseradish peroxidase-conjugated anti-mouse IgG antibody (1:5,000 dilution, Upstate) for 1 h at room temperature. The membrane was washed with TBST 3 times, analyzed by enhanced chemiluminescence and exposed to autoradiography film (FujiFilm).

#### Bioinformatics analysis

Autocorrelation was calculated with the ACF function in matlab. The GC content for each probe was calculated for the 20Kbp region surrounding the probe. Tissue specificity index in mouse was kindly provided by Dr. Itai Yanai, based on <sup>10</sup>. Expression data was downloaded from the GNF <sup>11</sup>. The conservation between human and mouse ToR was determined by locating the human homolog of a mouse gene (as defined by the DBTSS database ([http://dbtss\\_old.hgc.jp/hg17/](http://dbtss_old.hgc.jp/hg17/)) in the human BAC clones used in <sup>12</sup>. GO analysis was carried out using STEM <sup>13</sup>, with randomization as a multiple hypothesis correction. Significance of enrichments was calculated using the hypergeometric p-value unless stated otherwise.

| Name             | Cluster | Reported replication timing | reference | remarks                         |
|------------------|---------|-----------------------------|-----------|---------------------------------|
| Rag-1            | IV      | E                           | 3         |                                 |
| CD8              | II      | E                           | 3         |                                 |
| TdT              | II      | E                           | 3         |                                 |
| -Globin          | I       | E                           | 14        |                                 |
| C9               | I       | E                           | 14        |                                 |
| Thy-1            | I       | E                           | 14        |                                 |
| Tyrosine amino-  | II      | E                           | 14        |                                 |
| Metallothionein  | I       | E                           | 14        |                                 |
| Afp              | V       | L                           | 14        |                                 |
| Albumin          | V       | L                           | 14        |                                 |
| -globin          | VI      | L                           | 14        |                                 |
| CD19             | I       | E                           | 3         |                                 |
| CD11             | I       | E                           | 3         |                                 |
| Foxd10           | IV      | M                           | 15        |                                 |
| Nanog            | I       | E                           | 15        |                                 |
| C/EBPalpha       | I       | ME                          | 15        | E in ES and HSC cells           |
| c-myb            | I       | E                           | 15        |                                 |
| Gata1            | I       | E                           | 15        |                                 |
| Gata9            | I       | E                           | 15        |                                 |
| Gata10           | IV      | E                           | 15        | ME in HSC                       |
| Lmo9             | I       | E                           | 15        |                                 |
| Pax5             | I       | ME                          | 15        | E in ES cells                   |
| Myf5             | I       | L                           | 15        |                                 |
| MyoD             | I       | E                           | 15        |                                 |
| Myog             | I       | E                           | 15        |                                 |
| Hes1             | I       | E                           | 15        |                                 |
| Hes5             | I       | E                           | 15        |                                 |
| Irx10            | IV      | M                           | 15        |                                 |
| Mash1            | IV      | L                           | 15        | ML in HSC cells                 |
| Msx1             | IV      | L                           | 15        | ML in HSC cells, ME in ES cells |
| Ngn1             | II      | E                           | 15        |                                 |
| Ngn9             | II      | ME                          | 15        |                                 |
| Nkx9-9           | IV      | M                           | 15        |                                 |
| Nkx9-9           | V       | L                           | 15        |                                 |
| Olig9            | I       | E                           | 15        |                                 |
| Pax10            | V       | L                           | 15        |                                 |
| Pax6             | IV      | M                           | 15        |                                 |
| Pax7             | I       | ME                          | 15        | E in ES cells                   |
| Sox10            | VI      | L                           | 15        |                                 |
| Dmrt1            | I       | E                           | 16        |                                 |
| Tdgtf1 / Cripto  | I       | E                           | 16,15     |                                 |
| Tcfap9c          | II      | E                           | 16        |                                 |
| Utf1             | II      | E                           | 16,15     |                                 |
| 90100011A010Rik  | I       | E                           | 16        |                                 |
| Ptgis            | I       | E                           | 16        |                                 |
| Epha9            | I       | E                           | 16        |                                 |
| Pcolce           | I       | E                           | 16        |                                 |
| Ltbr             | I       | E                           | 16        |                                 |
| Ddr1             | I       | E                           | 16        |                                 |
| Dll1             | I       | E                           | 16        |                                 |
| Mmp15            | I       | E                           | 16        |                                 |
| Slc95a10         | I       | E                           | 16        |                                 |
| Nfatc1           | I       | E                           | 16        |                                 |
| Cdh11            | I       | E                           | 16        |                                 |
| Bmp1             | I       | E                           | 16        |                                 |
| Fgfr1            | I       | E                           | 16        |                                 |
| Gpr56            | I       | E                           | 16        |                                 |
| Cspg10           | I       | E                           | 16        |                                 |
| Lmo1             | V       | E                           | 16        |                                 |
| Ptn              | VI      | L                           | 16        |                                 |
| Tm11sf19         | V       | L                           | 16        |                                 |
| Ptprz1           | V       | L                           | 16        |                                 |
| Postn            | IV      | L                           | 16        |                                 |
| Lox              | V       | L                           | 16        |                                 |
| Sox6             | IV      | E                           | 16        |                                 |
| Ptgs9            | V       | L                           | 16        |                                 |
| Crisp1           | V       | E                           | 16        | validated in FISH to be L       |
| Adcy8            | V       | E                           | 16        | validated in FISH to be L       |
| Spp1             | V       | E                           | 16        |                                 |
| Car8             | V       | E                           | 16        |                                 |
| Nr0b1            | V       | L                           | 16        |                                 |
| A9m              | III     | L                           | 16        | validated in FISH to be M       |
| 170001011H111Rik | IV      | E                           | 16        |                                 |
| Ddx11            | II      | E                           | 16        |                                 |
| Rbpms            | I       | E                           | 16        |                                 |
| Tfpi             | I       | E                           | 16        |                                 |
| Mme              | V       | E                           | 16        |                                 |
| Egfr             | V       | E                           | 16        |                                 |
| Col1a9           | VI      | E                           | 16        |                                 |
| Terf1            | IV      | E                           | 16        |                                 |
| C1qr1            | V       | L                           | 16        |                                 |

**Table S1 - comparison with the literature**

In order to confirm our replication timing assignments, we performed a literature search and compiled previous information about the time of replication of mouse genes. The table contains the literature information along with the time of replication assigned by us. The colors mark cases in which our data confirm previous knowledge in a similar tissue (light blue; 60/81=74%), or only in a different tissue (yellow; additional 6 genes - 7.4%; the tissue in which the published TOR correspond to the microarray data is stated in the remarks column). Three of the cases in which our data contradict previous assignments were experimentally examined by us using the FISH procedure and in all those cases (labeled in purple) our assignment was confirmed. Overall 85% of the cases fit our assignments. In references3,14 and 15 replication timing were measured in lymphocytes whereas in reference 16 replication timing was measured in embryonic stem cells.

| Replication time zone | Category ID | Category Name                                                                | #Genes Category | #Genes Assigned | #Genes Expected | #Genes Enriched | p-value  | Corrected p-value |
|-----------------------|-------------|------------------------------------------------------------------------------|-----------------|-----------------|-----------------|-----------------|----------|-------------------|
| I                     | GO:0050875  | cellular physiological process                                               | 6068            | 3113            | 2487.1          | 625.9           | 6.80E-81 | <0.001            |
| I                     | GO:0044238  | primary metabolism                                                           | 4131            | 2171            | 1693.1          | 477.9           | 3.70E-62 | <0.001            |
| I                     | GO:0008152  | metabolism                                                                   | 4613            | 2383            | 1890.7          | 492.3           | 8.20E-61 | <0.001            |
| I                     | GO:0044237  | cellular metabolism                                                          | 4265            | 2202            | 1748.1          | 453.9           | 5.10E-55 | <0.001            |
| I                     | GO:0043170  | macromolecule metabolism                                                     | 2503            | 1366            | 1025.9          | 340.1           | 5.00E-48 | <0.001            |
| I                     | GO:0019538  | protein metabolism                                                           | 1874            | 1025            | 768.1           | 256.9           | 5.90E-36 | <0.001            |
| I                     | GO:0044267  | cellular protein metabolism                                                  | 1769            | 974             | 725             | 249             | 1.40E-35 | <0.001            |
| I                     | GO:0044260  | cellular macromolecule metabolism                                            | 1800            | 982             | 737.8           | 244.2           | 7.90E-34 | <0.001            |
| I                     | GO:0043283  | biopolymer metabolism                                                        | 1532            | 842             | 627.9           | 214.1           | 2.50E-30 | <0.001            |
| I                     | GO:0006139  | nucleobase, nucleoside, nucleotide and nucleic acid metabolism               | 1911            | 987             | 783.2           | 203.8           | 5.50E-23 | <0.001            |
| I                     | GO:0006464  | protein modification                                                         | 976             | 547             | 400             | 147             | 2.50E-22 | <0.001            |
| I                     | GO:0051244  | regulation of cellular physiological process                                 | 1863            | 961             | 763.6           | 197.4           | 3.70E-22 | <0.001            |
| I                     | GO:0043412  | biopolymer modification                                                      | 1011            | 562             | 414.4           | 147.6           | 7.70E-22 | <0.001            |
| I                     | GO:0050794  | regulation of cellular process                                               | 2019            | 1030            | 827.5           | 202.5           | 9.90E-22 | <0.001            |
| I                     | GO:0050791  | regulation of physiological process                                          | 1940            | 992             | 795.1           | 196.9           | 2.50E-21 | <0.001            |
| I                     | GO:0044249  | cellular biosynthesis                                                        | 682             | 390             | 279.5           | 110.5           | 3.80E-18 | <0.001            |
| I                     | GO:0009058  | biosynthesis                                                                 | 773             | 428             | 316.8           | 111.2           | 1.70E-16 | <0.001            |
| I                     | GO:0019222  | regulation of metabolism                                                     | 1460            | 748             | 598.4           | 149.6           | 2.00E-16 | <0.001            |
| I                     | GO:0009059  | macromolecule biosynthesis                                                   | 430             | 257             | 176.2           | 80.8            | 1.90E-15 | <0.001            |
| I                     | GO:0031323  | regulation of cellular metabolism                                            | 1397            | 714             | 572.6           | 141.4           | 2.00E-15 | <0.001            |
| I                     | GO:0006810  | transport                                                                    | 1758            | 877             | 720.5           | 156.5           | 2.60E-15 | <0.001            |
| I                     | GO:0006350  | transcription                                                                | 1324            | 676             | 542.7           | 133.3           | 1.60E-14 | <0.001            |
| I                     | GO:0006412  | protein biosynthesis                                                         | 388             | 233             | 159             | 74              | 1.90E-14 | <0.001            |
| I                     | GO:0016043  | cell organization and biogenesis                                             | 995             | 524             | 407.8           | 116.2           | 2.00E-14 | <0.001            |
| I                     | GO:0051179  | localization                                                                 | 1968            | 961             | 806.6           | 154.4           | 1.10E-13 | <0.001            |
| I                     | GO:0019219  | regulation of nucleobase, nucleoside, nucleotide and nucleic acid metabolism | 1302            | 661             | 533.6           | 127.4           | 1.40E-13 | <0.001            |
| I                     | GO:0051234  | establishment of localization                                                | 1953            | 953             | 800.5           | 152.5           | 1.80E-13 | <0.001            |
| I                     | GO:0045449  | regulation of transcription                                                  | 1286            | 651             | 527.1           | 123.9           | 4.30E-13 | <0.001            |
| I                     | GO:0007242  | intracellular signaling cascade                                              | 615             | 336             | 252.1           | 83.9            | 3.20E-12 | <0.001            |
| I                     | GO:0006351  | transcription, DNA-dependent                                                 | 1220            | 615             | 500             | 115             | 5.30E-12 | <0.001            |
| I                     | GO:0006355  | regulation of transcription, DNA-dependent                                   | 1205            | 607             | 493.9           | 113.1           | 8.60E-12 | <0.001            |
| I                     | GO:0006996  | organelle organization and biogenesis                                        | 477             | 267             | 195.5           | 71.5            | 1.90E-11 | <0.001            |
| I                     | GO:0006793  | phosphorus metabolism                                                        | 562             | 303             | 230.3           | 72.7            | 2.70E-10 | <0.001            |
| I                     | GO:0006796  | phosphate metabolism                                                         | 562             | 303             | 230.3           | 72.7            | 2.70E-10 | <0.001            |
| I                     | GO:0050790  | regulation of catalytic activity                                             | 126             | 84              | 51.6            | 32.4            | 4.80E-09 | <0.001            |
| I                     | GO:0008104  | protein localization                                                         | 413             | 226             | 169.3           | 56.7            | 9.40E-09 | <0.001            |
| I                     | GO:0016310  | phosphorylation                                                              | 462             | 248             | 189.4           | 58.6            | 1.80E-08 | <0.001            |
| I                     | GO:0045184  | establishment of protein localization                                        | 395             | 214             | 161.9           | 52.1            | 6.60E-08 | <0.001            |
| I                     | GO:0051243  | negative regulation of cellular physiological process                        | 389             | 211             | 159.4           | 51.6            | 7.20E-08 | <0.001            |
| I                     | GO:0015031  | protein transport                                                            | 379             | 206             | 155.3           | 50.7            | 8.30E-08 | <0.001            |
| I                     | GO:0009607  | response to biotic stimulus                                                  | 449             | 239             | 184             | 55              | 8.40E-08 | <0.001            |
| I                     | GO:0006955  | immune response                                                              | 372             | 202             | 152.5           | 49.5            | 1.20E-07 | <0.001            |
| I                     | GO:0007049  | cell cycle                                                                   | 358             | 195             | 146.7           | 48.3            | 1.50E-07 | <0.001            |
| I                     | GO:0016070  | RNA metabolism                                                               | 250             | 143             | 102.5           | 40.5            | 1.50E-07 | <0.001            |
| I                     | GO:0043118  | negative regulation of physiological process                                 | 407             | 218             | 166.8           | 51.2            | 1.60E-07 | <0.001            |
| I                     | GO:0006915  | apoptosis                                                                    | 346             | 189             | 141.8           | 47.2            | 1.80E-07 | <0.001            |
| I                     | GO:0051649  | establishment of cellular localization                                       | 393             | 211             | 161.1           | 49.9            | 2.00E-07 | <0.001            |
| I                     | GO:0006512  | ubiquitin cycle                                                              | 258             | 146             | 105.7           | 40.3            | 2.70E-07 | <0.001            |
| I                     | GO:0046907  | intracellular transport                                                      | 390             | 209             | 159.8           | 49.2            | 2.80E-07 | <0.001            |
| I                     | GO:0051641  | cellular localization                                                        | 399             | 213             | 163.5           | 49.5            | 3.10E-07 | <0.001            |
| I                     | GO:0006950  | response to stress                                                           | 526             | 272             | 215.6           | 56.4            | 3.30E-07 | <0.001            |
| I                     | GO:0006952  | defense response                                                             | 426             | 225             | 174.6           | 50.4            | 4.40E-07 | <0.001            |
| I                     | GO:0012501  | programmed cell death                                                        | 352             | 190             | 144.3           | 45.7            | 5.00E-07 | <0.001            |
| I                     | GO:0006468  | protein amino acid phosphorylation                                           | 406             | 215             | 166.4           | 48.6            | 6.10E-07 | <0.001            |
| I                     | GO:0048519  | negative regulation of biological process                                    | 499             | 258             | 204.5           | 53.5            | 6.70E-07 | <0.001            |
| I                     | GO:0007243  | protein kinase cascade                                                       | 136             | 84              | 55.7            | 28.3            | 7.70E-07 | <0.001            |
| I                     | GO:0016265  | death                                                                        | 369             | 197             | 151.2           | 45.8            | 8.50E-07 | <0.001            |
| I                     | GO:0008219  | cell death                                                                   | 369             | 197             | 151.2           | 45.8            | 8.50E-07 | <0.001            |
| I                     | GO:0048523  | negative regulation of cellular process                                      | 461             | 239             | 188.9           | 50.1            | 1.30E-06 | <0.001            |
| I                     | GO:0043285  | biopolymer catabolism                                                        | 153             | 92              | 62.7            | 29.3            | 1.30E-06 | <0.001            |
| I                     | GO:0042981  | regulation of apoptosis                                                      | 222             | 126             | 91              | 35              | 1.40E-06 | <0.001            |
| I                     | GO:0006457  | protein folding                                                              | 113             | 71              | 46.3            | 24.7            | 2.20E-06 | <0.001            |
| I                     | GO:0009057  | macromolecule catabolism                                                     | 201             | 115             | 82.4            | 32.6            | 2.30E-06 | <0.001            |
| I                     | GO:0006396  | RNA processing                                                               | 191             | 110             | 78.3            | 31.7            | 2.50E-06 | <0.001            |
| I                     | GO:0005975  | carbohydrate metabolism                                                      | 297             | 161             | 121.7           | 39.3            | 2.50E-06 | <0.001            |
| I                     | GO:0043067  | regulation of programmed cell death                                          | 226             | 127             | 92.6            | 34.4            | 2.60E-06 | <0.001            |
| I                     | GO:0006886  | intracellular protein transport                                              | 259             | 142             | 106.2           | 35.8            | 4.30E-06 | 0.004             |
| I                     | GO:0006807  | nitrogen compound metabolism                                                 | 228             | 127             | 93.4            | 33.6            | 4.70E-06 | 0.004             |
| I                     | GO:0019752  | carboxylic acid metabolism                                                   | 303             | 162             | 124.2           | 37.8            | 6.90E-06 | 0.004             |
| I                     | GO:0006082  | organic acid metabolism                                                      | 303             | 162             | 124.2           | 37.8            | 6.90E-06 | 0.004             |
| I                     | GO:0006259  | DNA metabolism                                                               | 301             | 161             | 123.4           | 37.6            | 7.10E-06 | 0.004             |
| I                     | GO:0030163  | protein catabolism                                                           | 130             | 78              | 53.3            | 24.7            | 9.10E-06 | 0.004             |
| I                     | GO:0007028  | cytoplasm organization and biogenesis                                        | 61              | 42              | 25              | 17              | 9.90E-06 | 0.006             |
| I                     | GO:0046649  | lymphocyte activation                                                        | 93              | 59              | 38.1            | 20.9            | 1.00E-05 | 0.006             |
| I                     | GO:0045321  | immune cell activation                                                       | 107             | 66              | 43.9            | 22.1            | 1.20E-05 | 0.006             |
| I                     | GO:0009308  | amine metabolism                                                             | 216             | 119             | 88.5            | 30.5            | 1.80E-05 | 0.006             |
| I                     | GO:0051603  | proteolysis during cellular protein catabolism                               | 108             | 66              | 44.3            | 21.7            | 1.90E-05 | 0.006             |
| I                     | GO:0001775  | cell activation                                                              | 108             | 66              | 44.3            | 21.7            | 1.90E-05 | 0.006             |
| I                     | GO:0044257  | cellular protein catabolism                                                  | 108             | 66              | 44.3            | 21.7            | 1.90E-05 | 0.006             |
| I                     | GO:0043037  | translation                                                                  | 112             | 68              | 45.9            | 22.1            | 1.90E-05 | 0.006             |
| I                     | GO:0048518  | positive regulation of biological process                                    | 453             | 229             | 185.7           | 43.3            | 2.10E-05 | 0.006             |
| I                     | GO:0051726  | regulation of cell cycle                                                     | 190             | 106             | 77.9            | 28.1            | 2.50E-05 | 0.006             |
| I                     | GO:0009056  | catabolism                                                                   | 356             | 184             | 145.9           | 38.1            | 2.60E-05 | 0.006             |
| I                     | GO:0051246  | regulation of protein metabolism                                             | 151             | 87              | 61.9            | 25.1            | 2.60E-05 | 0.006             |
| I                     | GO:0042110  | T cell activation                                                            | 59              | 40              | 24.2            | 15.8            | 2.80E-05 | 0.006             |
| I                     | GO:0044265  | cellular macromolecule catabolism                                            | 174             | 98              | 71.3            | 26.7            | 3.00E-05 | 0.006             |
| I                     | GO:0007264  | small GTPase mediated signal transduction                                    | 191             | 106             | 78.3            | 27.7            | 3.40E-05 | 0.008             |
| I                     | GO:0000074  | regulation of progression through cell cycle                                 | 189             | 105             | 77.5            | 27.5            | 3.50E-05 | 0.008             |
| I                     | GO:0007010  | cytoskeleton organization and biogenesis                                     | 229             | 124             | 93.9            | 30.1            | 3.70E-05 | 0.008             |
| I                     | GO:0051338  | regulation of transferase activity                                           | 69              | 45              | 28.3            | 16.7            | 4.10E-05 | 0.008             |
| I                     | GO:0016568  | chromatin modification                                                       | 75              | 48              | 30.7            | 17.3            | 4.70E-05 | 0.008             |
| I                     | GO:0046651  | lymphocyte proliferation                                                     | 40              | 29              | 16.4            | 12.6            | 5.30E-05 | 0.01              |
| I                     | GO:0043085  | positive regulation of enzyme activity                                       | 66              | 43              | 27.1            | 15.9            | 6.20E-05 | 0.018             |
| I                     | GO:0043549  | regulation of kinase activity                                                | 68              | 44              | 27.9            | 16.1            | 6.60E-05 | 0.018             |
| I                     | GO:0009605  | response to external stimulus                                                | 271             | 142             | 111.1           | 30.9            | 8.90E-05 | 0.034             |
| I                     | GO:0009892  | negative regulation of metabolism                                            | 184             | 101             | 75.4            | 25.6            | 9.20E-05 | 0.036             |
| I                     | GO:0006954  | inflammatory response                                                        | 116             | 68              | 47.5            | 20.5            | 9.20E-05 | 0.036             |
| I                     | GO:0030097  | hemopoiesis                                                                  | 114             | 67              | 46.7            | 20.3            | 9.30E-05 | 0.036             |
| I                     | GO:0051276  | chromosome organization and biogenesis                                       | 149             | 84              | 61.1            | 22.9            | 1.00E-04 | 0.04              |
| I                     | GO:0043086  | negative regulation of enzyme activity                                       | 27              | 21              | 11.1            | 9.9             | 1.10E-04 | 0.04              |
| I                     | GO:0009100  | glycoprotein metabolism                                                      | 73              | 46              | 29.9            | 16.1            | 1.20E-04 | 0.042             |
| I                     | GO:0018193  | peptidyl-amino acid modification                                             | 54              | 36              | 22.1            | 13.9            | 1.20E-04 | 0.042             |
| I                     | GO:0006818  | hydrogen transport                                                           | 56              | 37              | 23              | 14              | 1.30E-04 | 0.044             |
| II                    | GO:0001910  | regulation of immune cell mediated cytotoxicity                              | 7               | 5               | 0.6             | 4.4             | 8.30E-05 | 0.03              |
| II                    | GO:0031341  | regulation of cell killing                                                   | 7               | 5               | 0.6             | 4.4             | 8.30E-05 | 0.03              |
| III                   | GO:0045095  | keratin filament                                                             | 12              | 8               | 0.9             | 7.1             | 4.10E-07 | 0.001             |
| III                   | GO:0006030  | chitin metabolism                                                            | 9               | 5               | 0.7             | 4.3             | 2.40E-04 | 0.088             |
| IV                    | GO:0030901  | midbrain development                                                         | 11              | 7               | 1.4             | 5.6             | 1.00E-04 | 0.066             |
| V                     | GO:0007186  | G-protein coupled receptor protein signaling pathway                         | 1135            | 255             | 135             | 120             | 8.5E-25  | <0.001            |
| V                     | GO:0007166  | cell surface receptor linked signal transduction                             | 1542            | 293             | 183.3           | 109.7           | 5.7E-17  | <0.001            |
| V                     | GO:0007165  | signal transduction                                                          | 2371            | 357             | 281.9           | 75.1            | 7.4E-07  | <0.001            |
| V                     | GO:0007154  | cell communication                                                           | 2520            | 368             | 299.6           | 68.4            | 9.3E-06  | <0.001            |
| V                     | GO:0007606  | sensory perception of chemical stimulus                                      | 99              | 27              | 11.8            | 15.2            | 2.4E-05  | 0.006             |
| VI                    | GO:0007186  | G-protein coupled receptor protein signaling pathway                         | 1135            | 267             | 100.5           | 166.5           | 2.7E-52  | <0.001            |
| VI                    | GO:0007166  | cell surface receptor linked signal transduction                             | 1542            | 286             | 136.5           | 149.5           | 4.6E-35  | <0.001            |
| VI                    | GO:0007606  | sensory perception of chemical stimulus                                      | 99              | 40              | 8.8             | 31.2            | 2.5E-17  | <0.001            |
| VI                    | GO:0007154  | cell communication                                                           | 2520            | 339             | 223.1           | 115.9           | 4.8E-16  | <0.001            |
| VI                    | GO:0007165  | signal transduction                                                          | 2371            | 320             | 209.9           | 110.1           | 2.4E-15  | <0.001            |
| VI                    | GO:0007608  | sensory perception of smell                                                  | 61              | 28              | 5.4             | 22.6            | 3E-14    | <0.001            |
| VI                    | GO:0031424  | keratinization                                                               | 19              | 13              | 1.7             | 11.3            | 3.2E-10  | <0.001            |
| VI                    | GO:0050877  | neurophysiological process                                                   | 343             | 65              | 30.4            | 34.6            | 3.4E-09  | <0.001            |
| VI                    | GO:0007600  | sensory perception                                                           | 216             | 46              | 19.1            | 26.9            | 1.7E-08  | <0.001            |
| VI                    | GO:0009913  | epidermal cell differentiation                                               | 29              | 13              | 2.6             | 10.4            | 3.5E-07  | <0.001            |
| VI                    | GO:0048730  | epidermis morphogenesis                                                      | 33              | 13              | 2.9             | 10.1            | 2.1E-06  | 0.002             |
| VI                    | GO:0050909  | sensory perception of taste                                                  | 29              | 12              | 2.6             | 9.4             | 2.8E-06  | 0.002             |
| VI                    | GO:0007214  | gamma-aminobutyric acid signaling pathway                                    | 10              | 7               | 0.9             | 6.1             | 4E-06    | 0.004             |

Table S2 -GO annotation analysis

Each of the seven replication time zones was analyzed for enrichment of GO biological process categories using the STEM software. The P values were corrected for multiple hypothesis using 1000 randomizations. All categories with corrected P<0.05 are shown. House keeping categories are labeled in cyan, lymphocytes specific categories in purple, other tissue specific categories in yellow and stress and apoptosis categories in green.

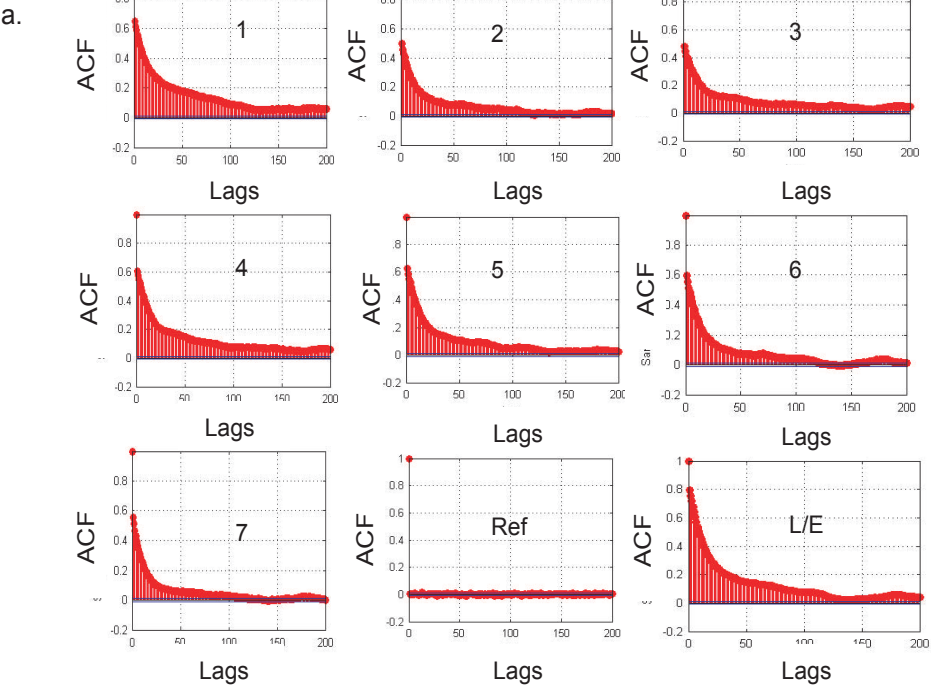

Data sorted by location on chromosome

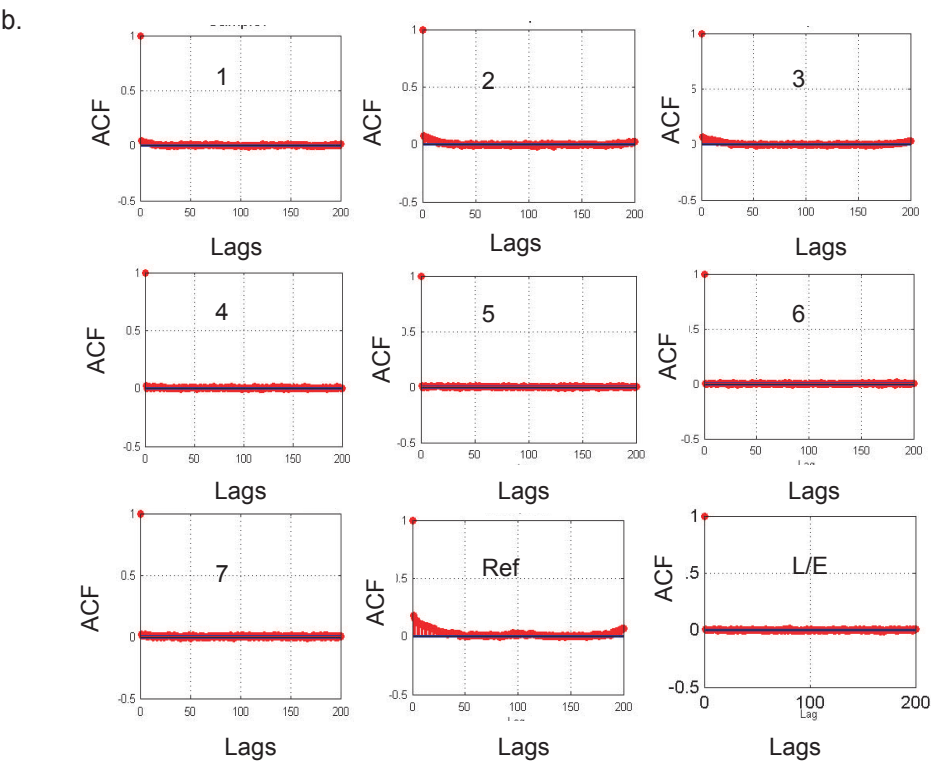

Data sorted by location on the array

**Figure S1 Autocorrelation analysis**  
Autocorrelation of all probes for all samples with their neighboring probes sorted by their chromosomal position (a) or location on the array (b) at increasing distance (lag). Note that, in a, strong correlation is observed for up to at least 100 neighboring sequences (lag=100) for all samples besides the reference sample, whereas, in b, no significant autocorrelation is evident for the data sorted by array location.

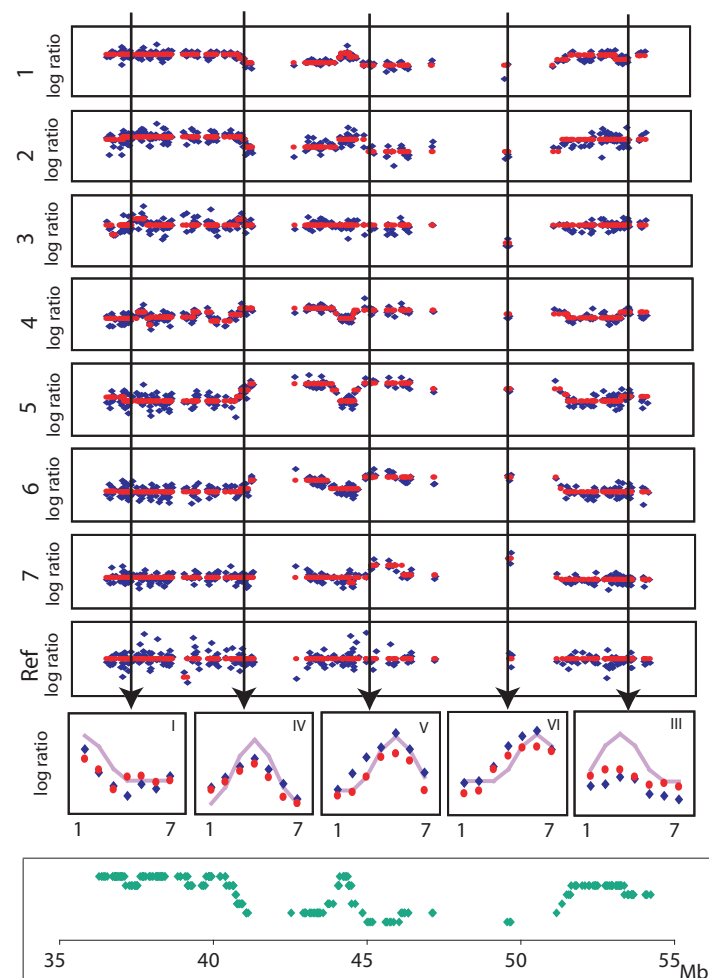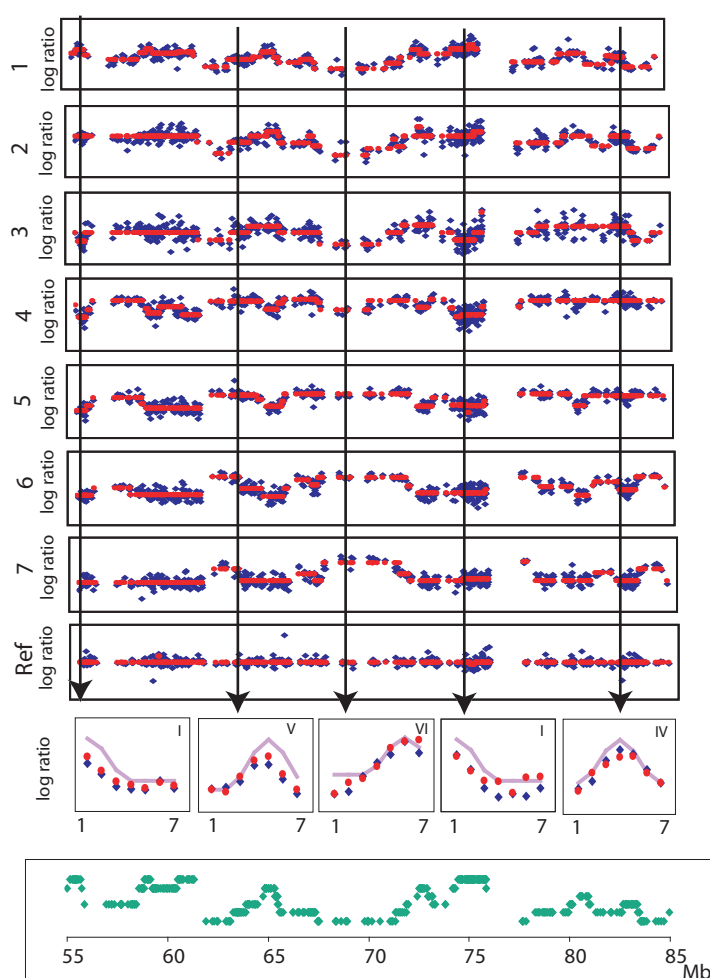

**Figure S2 Genome wide measurements of replication timing.**

Large genomic regions of chromosome 1 (total of 64Mb) are shown. BrdU enrichment raw (blue) and processed (red) data are shown for samples 1-7 and for the control experiments (ref). Detailed description of the raw and processed enrichment values (blue and red respectively) are shown for selected regions (arrows) along with the ToR cluster they were assigned to (purple line). The Roman numbers in each graph represent the ToR assignment (same as in figure 3a). ToR maps of the entire region are shown in the lower panels.

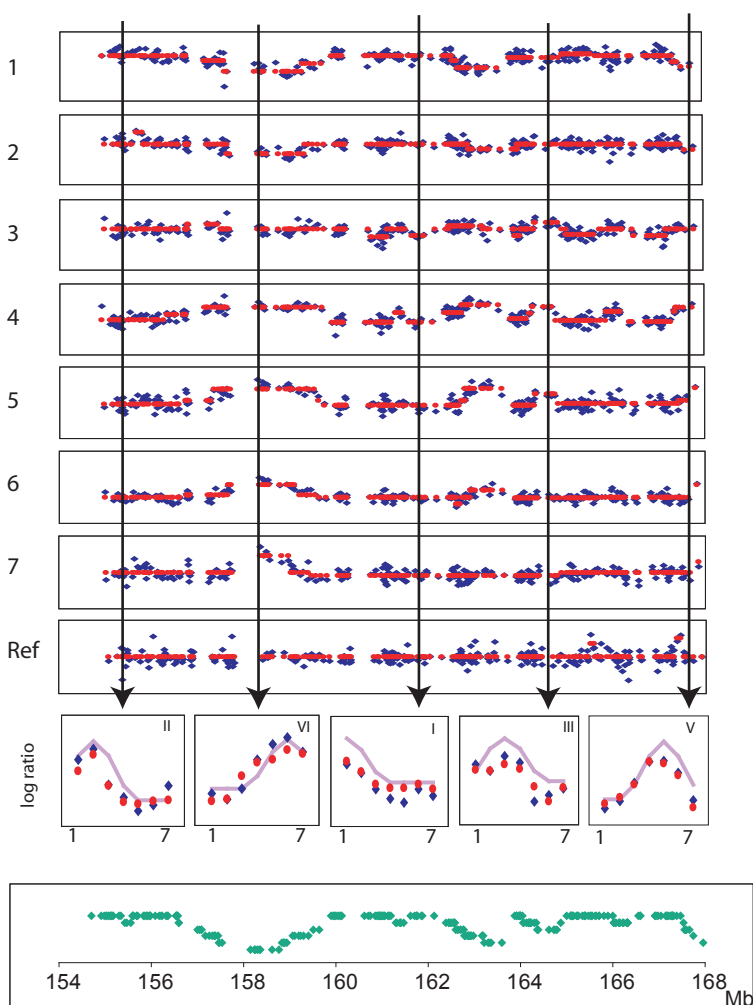



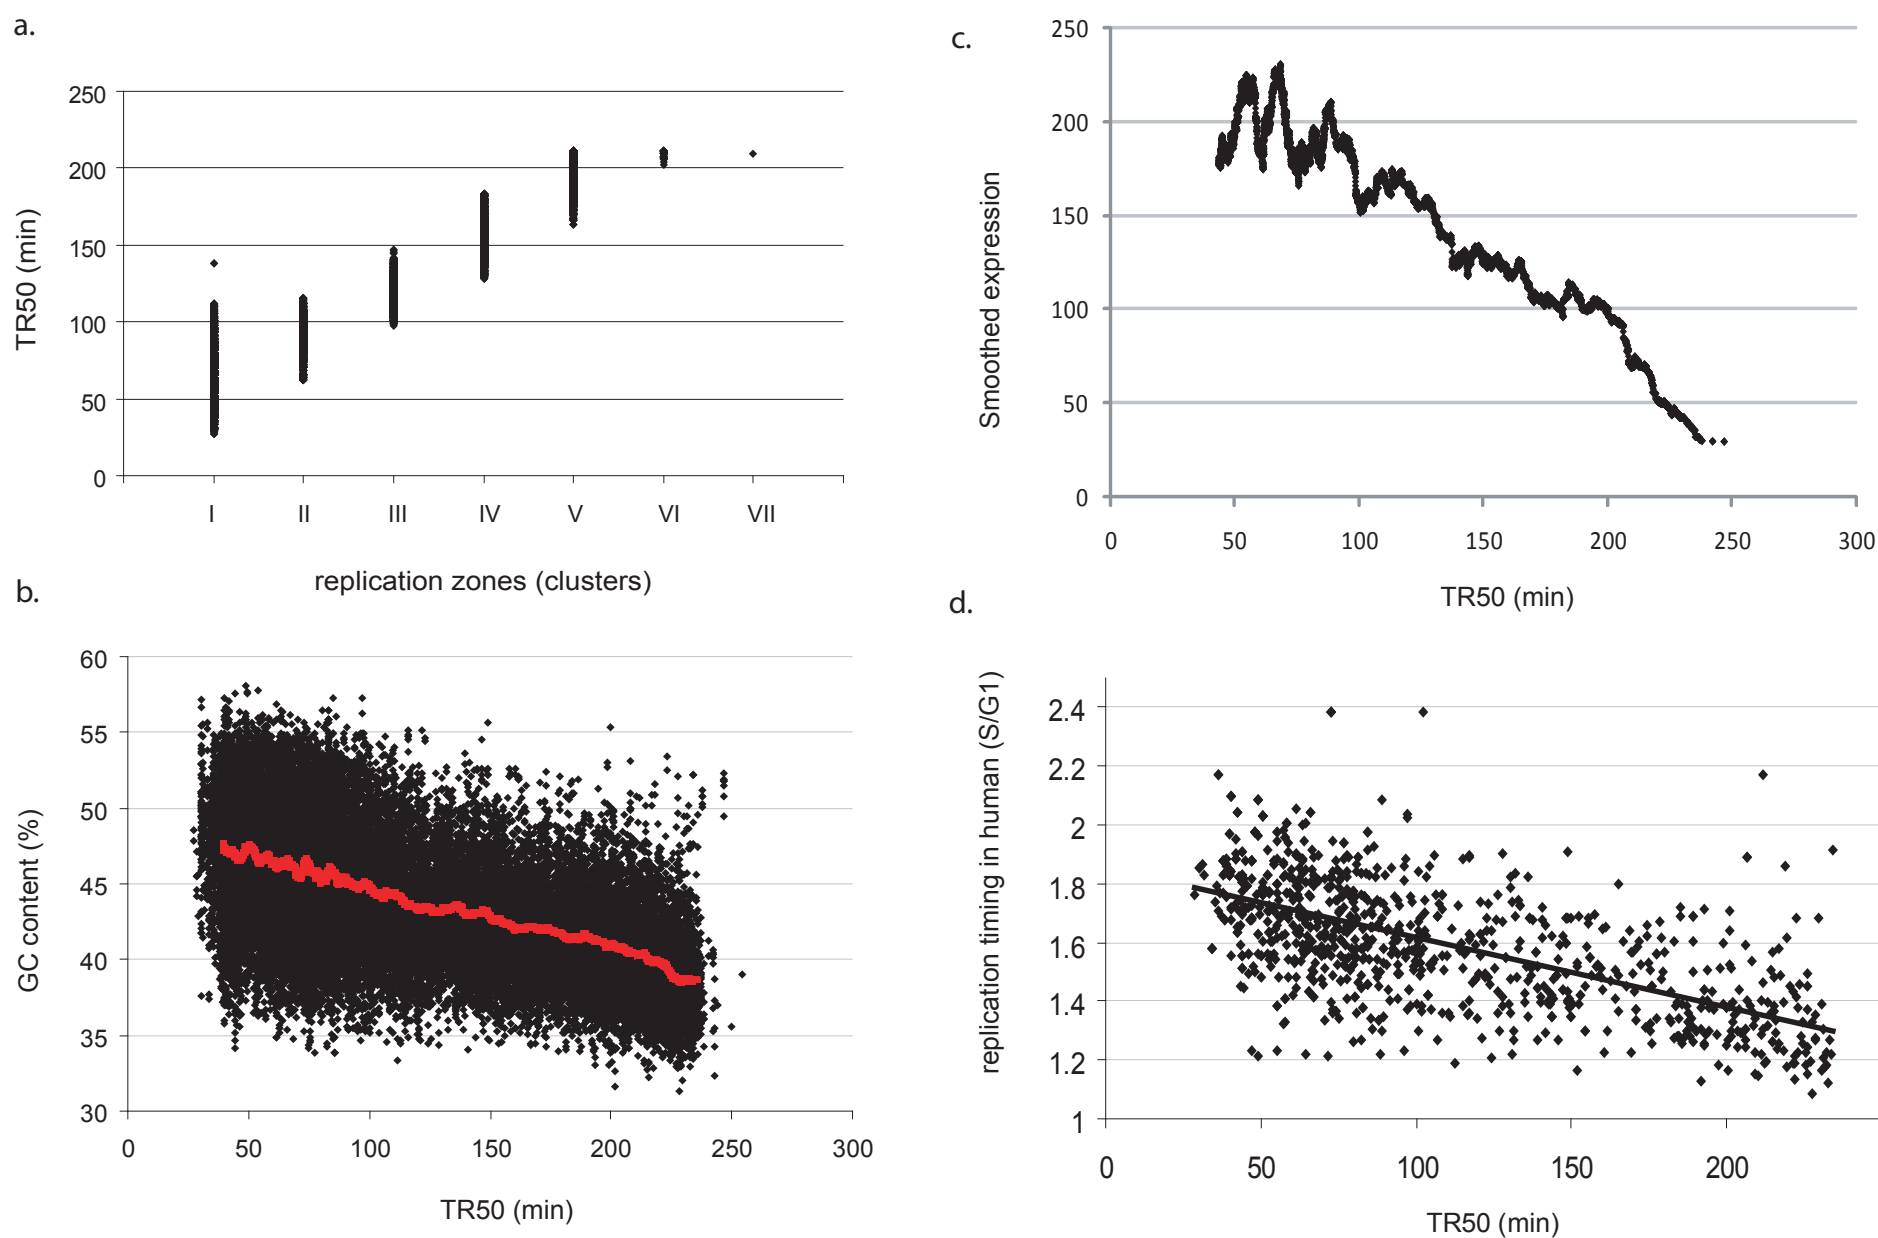

**Figure S3 Comparison between two analysis methods (TR50 and supervised clustering)**

a. Correlation between TR50 values and replication zones assignment for all probes in the array ( $r=0.95$ ). b. Correlation between TR50 and GC content ( $r=0.5$ ) , smoothed GC content (window size = 1000 probes) is overlaid in red. This analysis is equivalent to the analysis presented in Fig3b for the replication zones assignment. c. Correlation between TR50 and smoothed (window size=1000 probes) expression in L1210 cells. This analysis is equivalent to the analysis presented in FigS11 for the replication zones assignment. d. Correlation between replication timing in mouse (TR50) and human (S/G1 ratio; White et al.), linear regression is overlaid in black ( $r=0.61$ ). This analysis is equivalent to the analysis presented in Fig6 for the replication zones assignment.

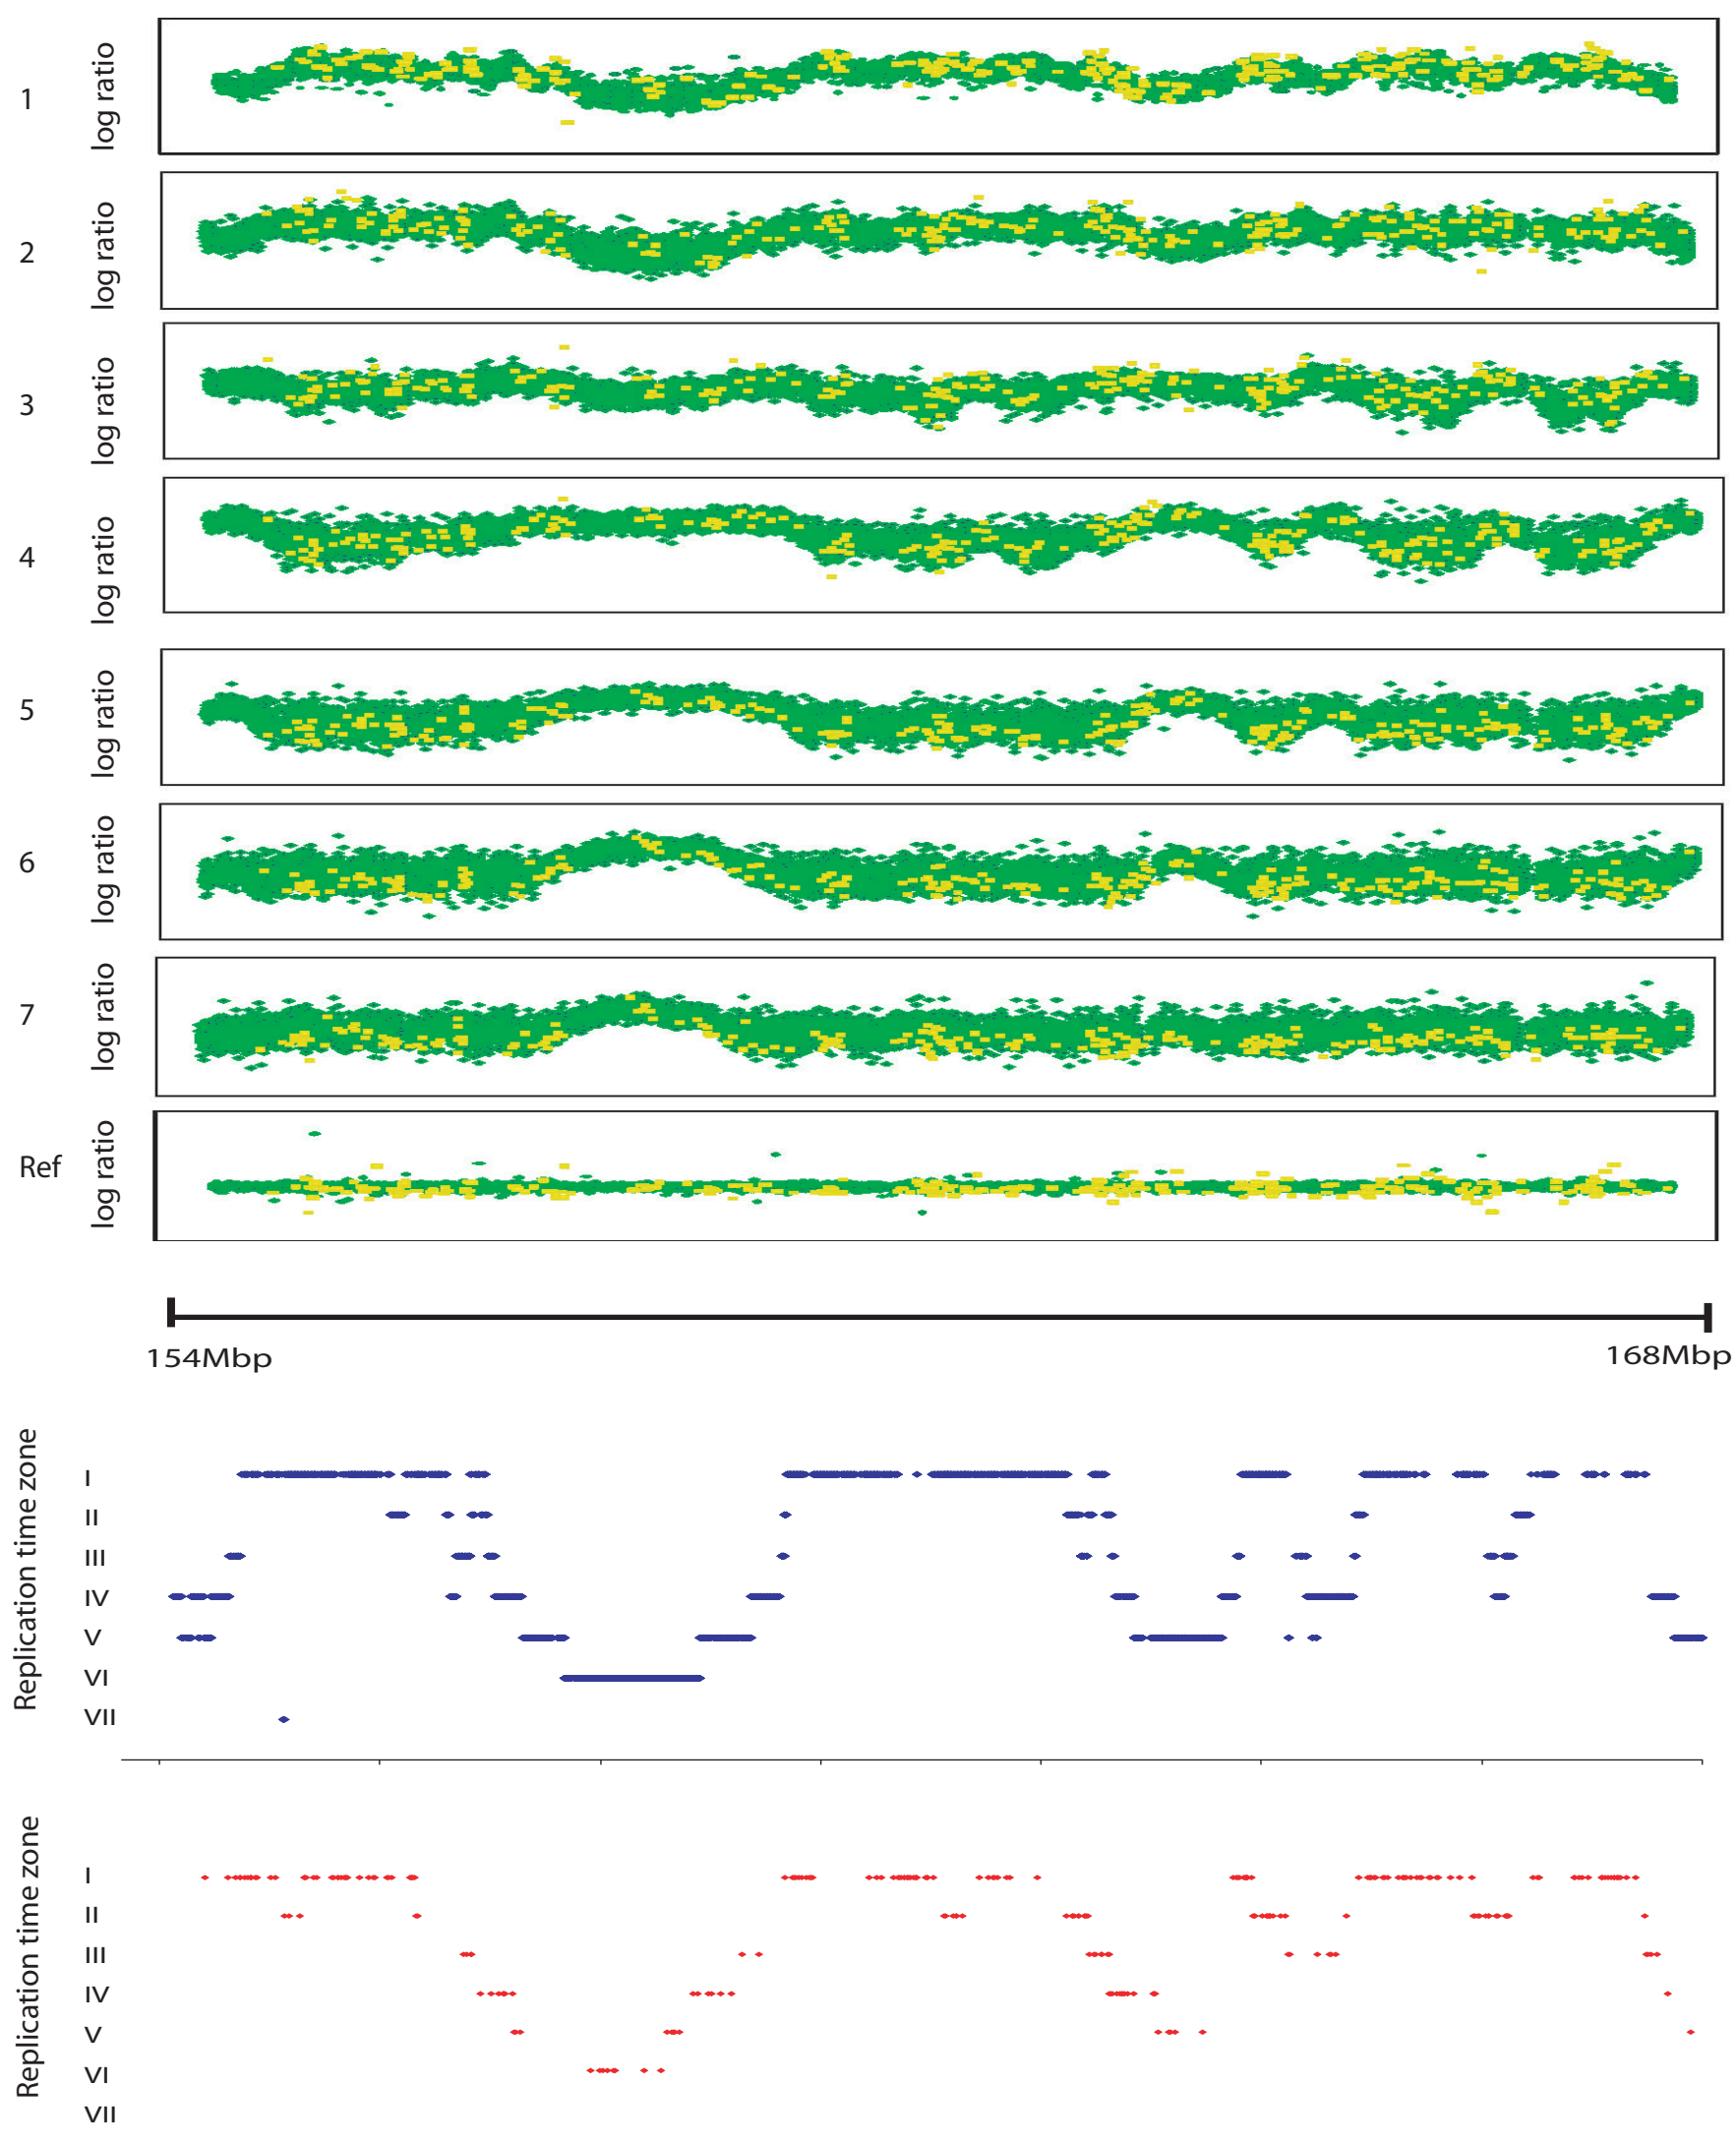

**Figure S4 Comparison between high and low resolution arrays**

Raw enrichment values of the seven samples and of the control experiment (Ref) from the aCGH arrays (yellow) and from a high density array with 1Kb spacing between probes (green) are overlaid one on top of the other, for 14Mb region on mouse chromosome 1. The data from both types of arrays was processed and the assigned ToR is shown in the bottom panels (blue for the tiling array and red for the aCGH). Note that the two maps are almost identical with 98% of the regions assigned a ToR identical or very similar (maximum difference of 45 minutes).

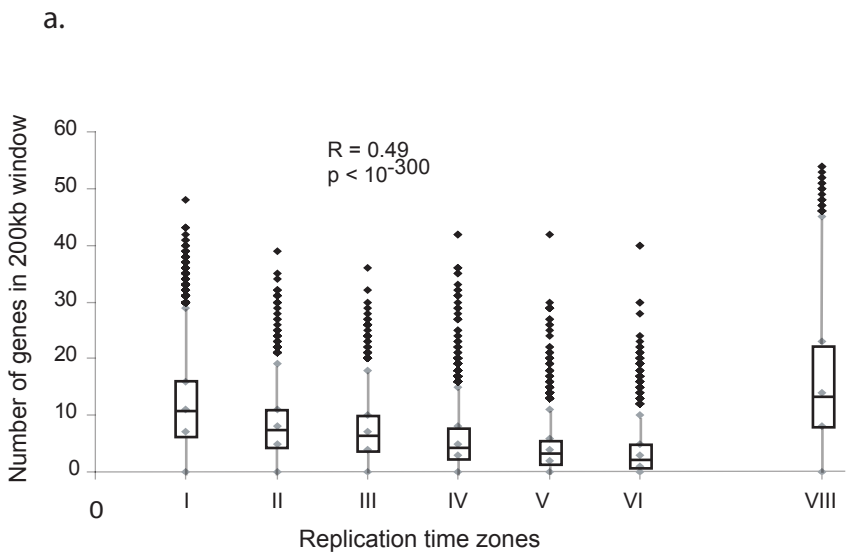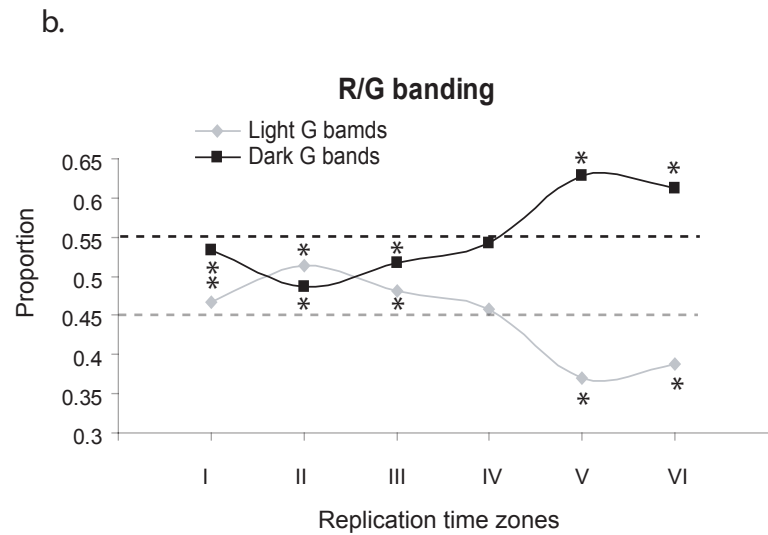

**Figure S5 Gene Density and Giemsa Bands correlation to replication timing**

a. Box plot representation of gene density in the 200 Kb regions surrounding each probe assigned to each cluster. The correlation to a regression line ( $R$ ) and the F statistic  $P$  value are shown. Note the nice correspondence between the replication timing and the gene density and the high gene density observed for asynchronous genes (cluster VIII). b. the percentage of probes reside in light (grey) or dark (black) Giemsa bands in each of the replication time zones. The average percentage of probes in each type of bands is marked with dashed lines. Asterisks marks cases in which the observed values differ significantly ( $P < 0.0005$ ) from the average.



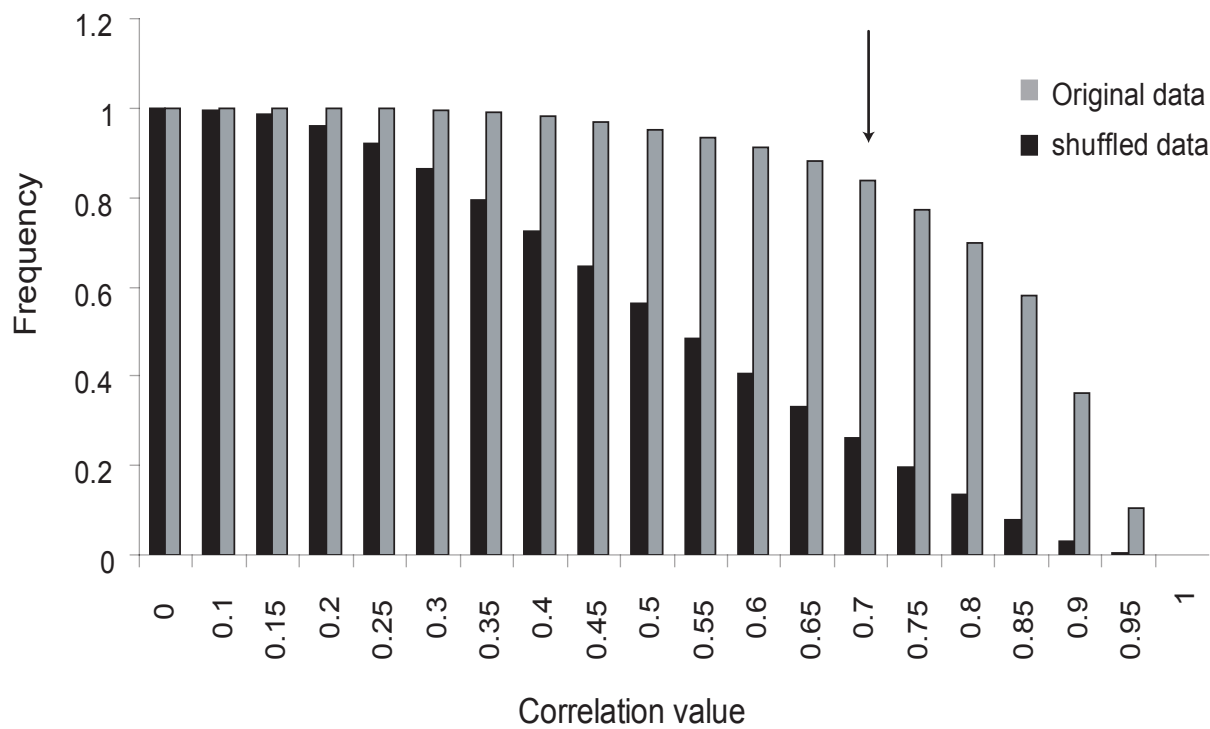

**Figure S6 Effect of shuffling the data on replication timing assignment**

For each probe the correlation to the seven predefined patterns (figure 3a) was calculated and the maximum value was considered. Cumulative histogram of the frequency of probes having at least a given correlation value for the original data (grey) and for shuffled data (black) is shown. The arrow marks the threshold chosen for further analysis ( $r \leq 0.7$ ). Note that the original data show higher correlation values than the shuffled data, indicating that indeed most of the genome replicates at a discrete time. For example at the chosen threshold of  $r \leq 0.7$  there is 2.8 folds enrichment over the shuffled data.

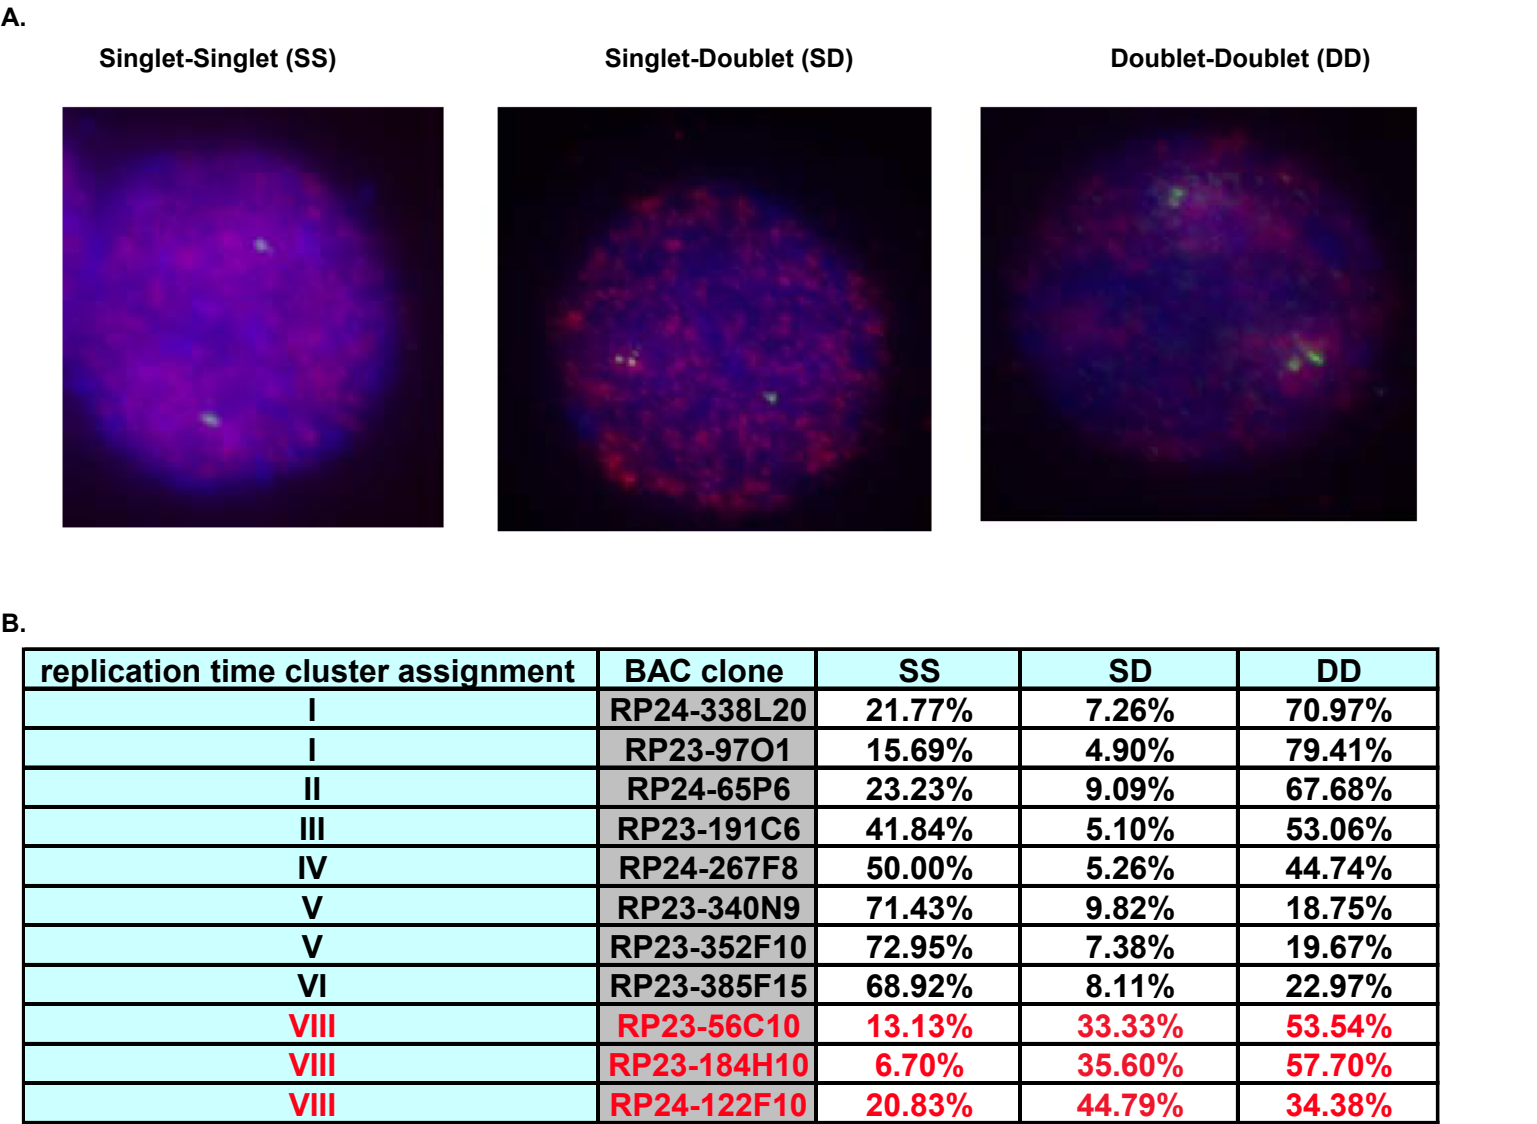

**Figure S7 FISH based validation of the replication timing**  
The time of replication of a locus can be determined by counting the percentage of S phase nuclei in which no allele replicated (singlet-singlet; SS) one allele replicated (singlet- Doublet; SD) or both alleles replicated (doublet-doublet; DD). Representative nuclei for each of these patterns are shown in A. The percentages of S phase nuclei showing each pattern for 11 BAC clones are shown in B along with the replication zone assigned in the current study for these regions. The difference between the percentage of the SD of cluster VIII probes (red) and the average SD of the other probes is extremely significant (P Value <10-40 for each; Z test), suggesting that indeed those probes replicate asynchronously.

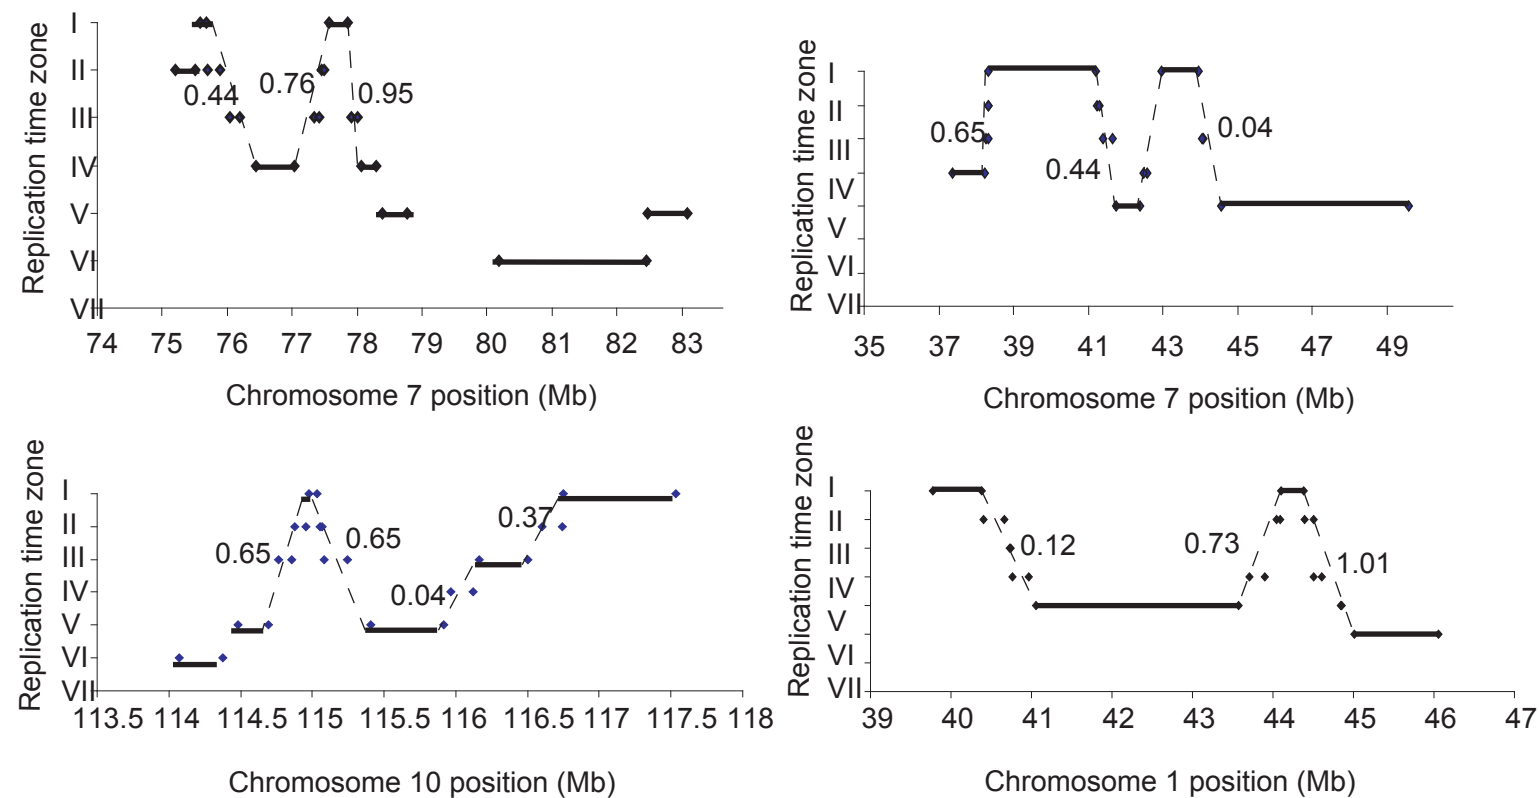

**Figure S8 Genomic organization of the replication zones**

Large replication segments (>250Kb; black bars) and small replication segments (<250Kb; each flanked by two dots) are shown for several regions. The vertical position of each line represents its replication time and the horizontal position its location on the different chromosomes. Dashed lines represent the predicted replication timing of the region assuming a passive movement of the replication fork from the early to the late region. The numbers next to the dashed lines represent the RMSD values between the dots and the dashed line. Note the good agreement between the predicted passive replication time (dashed line) and the actual timing (black dots).

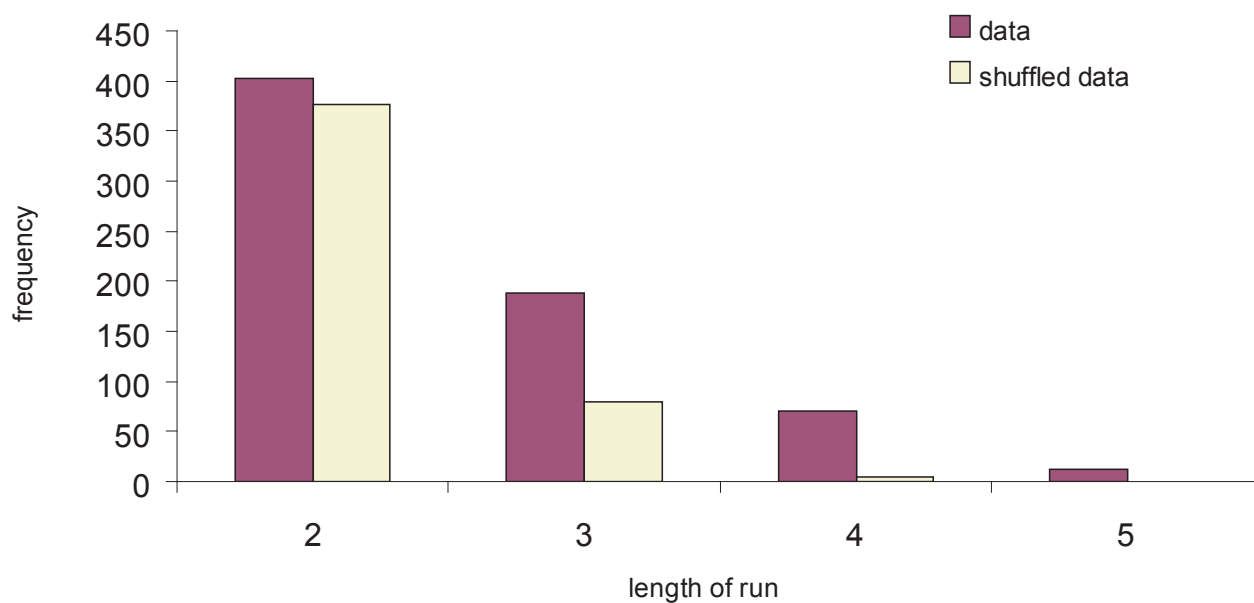

### Figure S9 Runs length analysis

In order to evaluate the significance of the gradual replication zones in our data, the length of each run of consecutive replication zones was calculated (i.e. a run with replication zones 7,6 and 5 was considered as a run with a length of 2) . Longer runs were significantly enriched in our data (red) compared to the shuffled data (yellow) (p-value  $5 \times 10^{-43}$ , t-test).

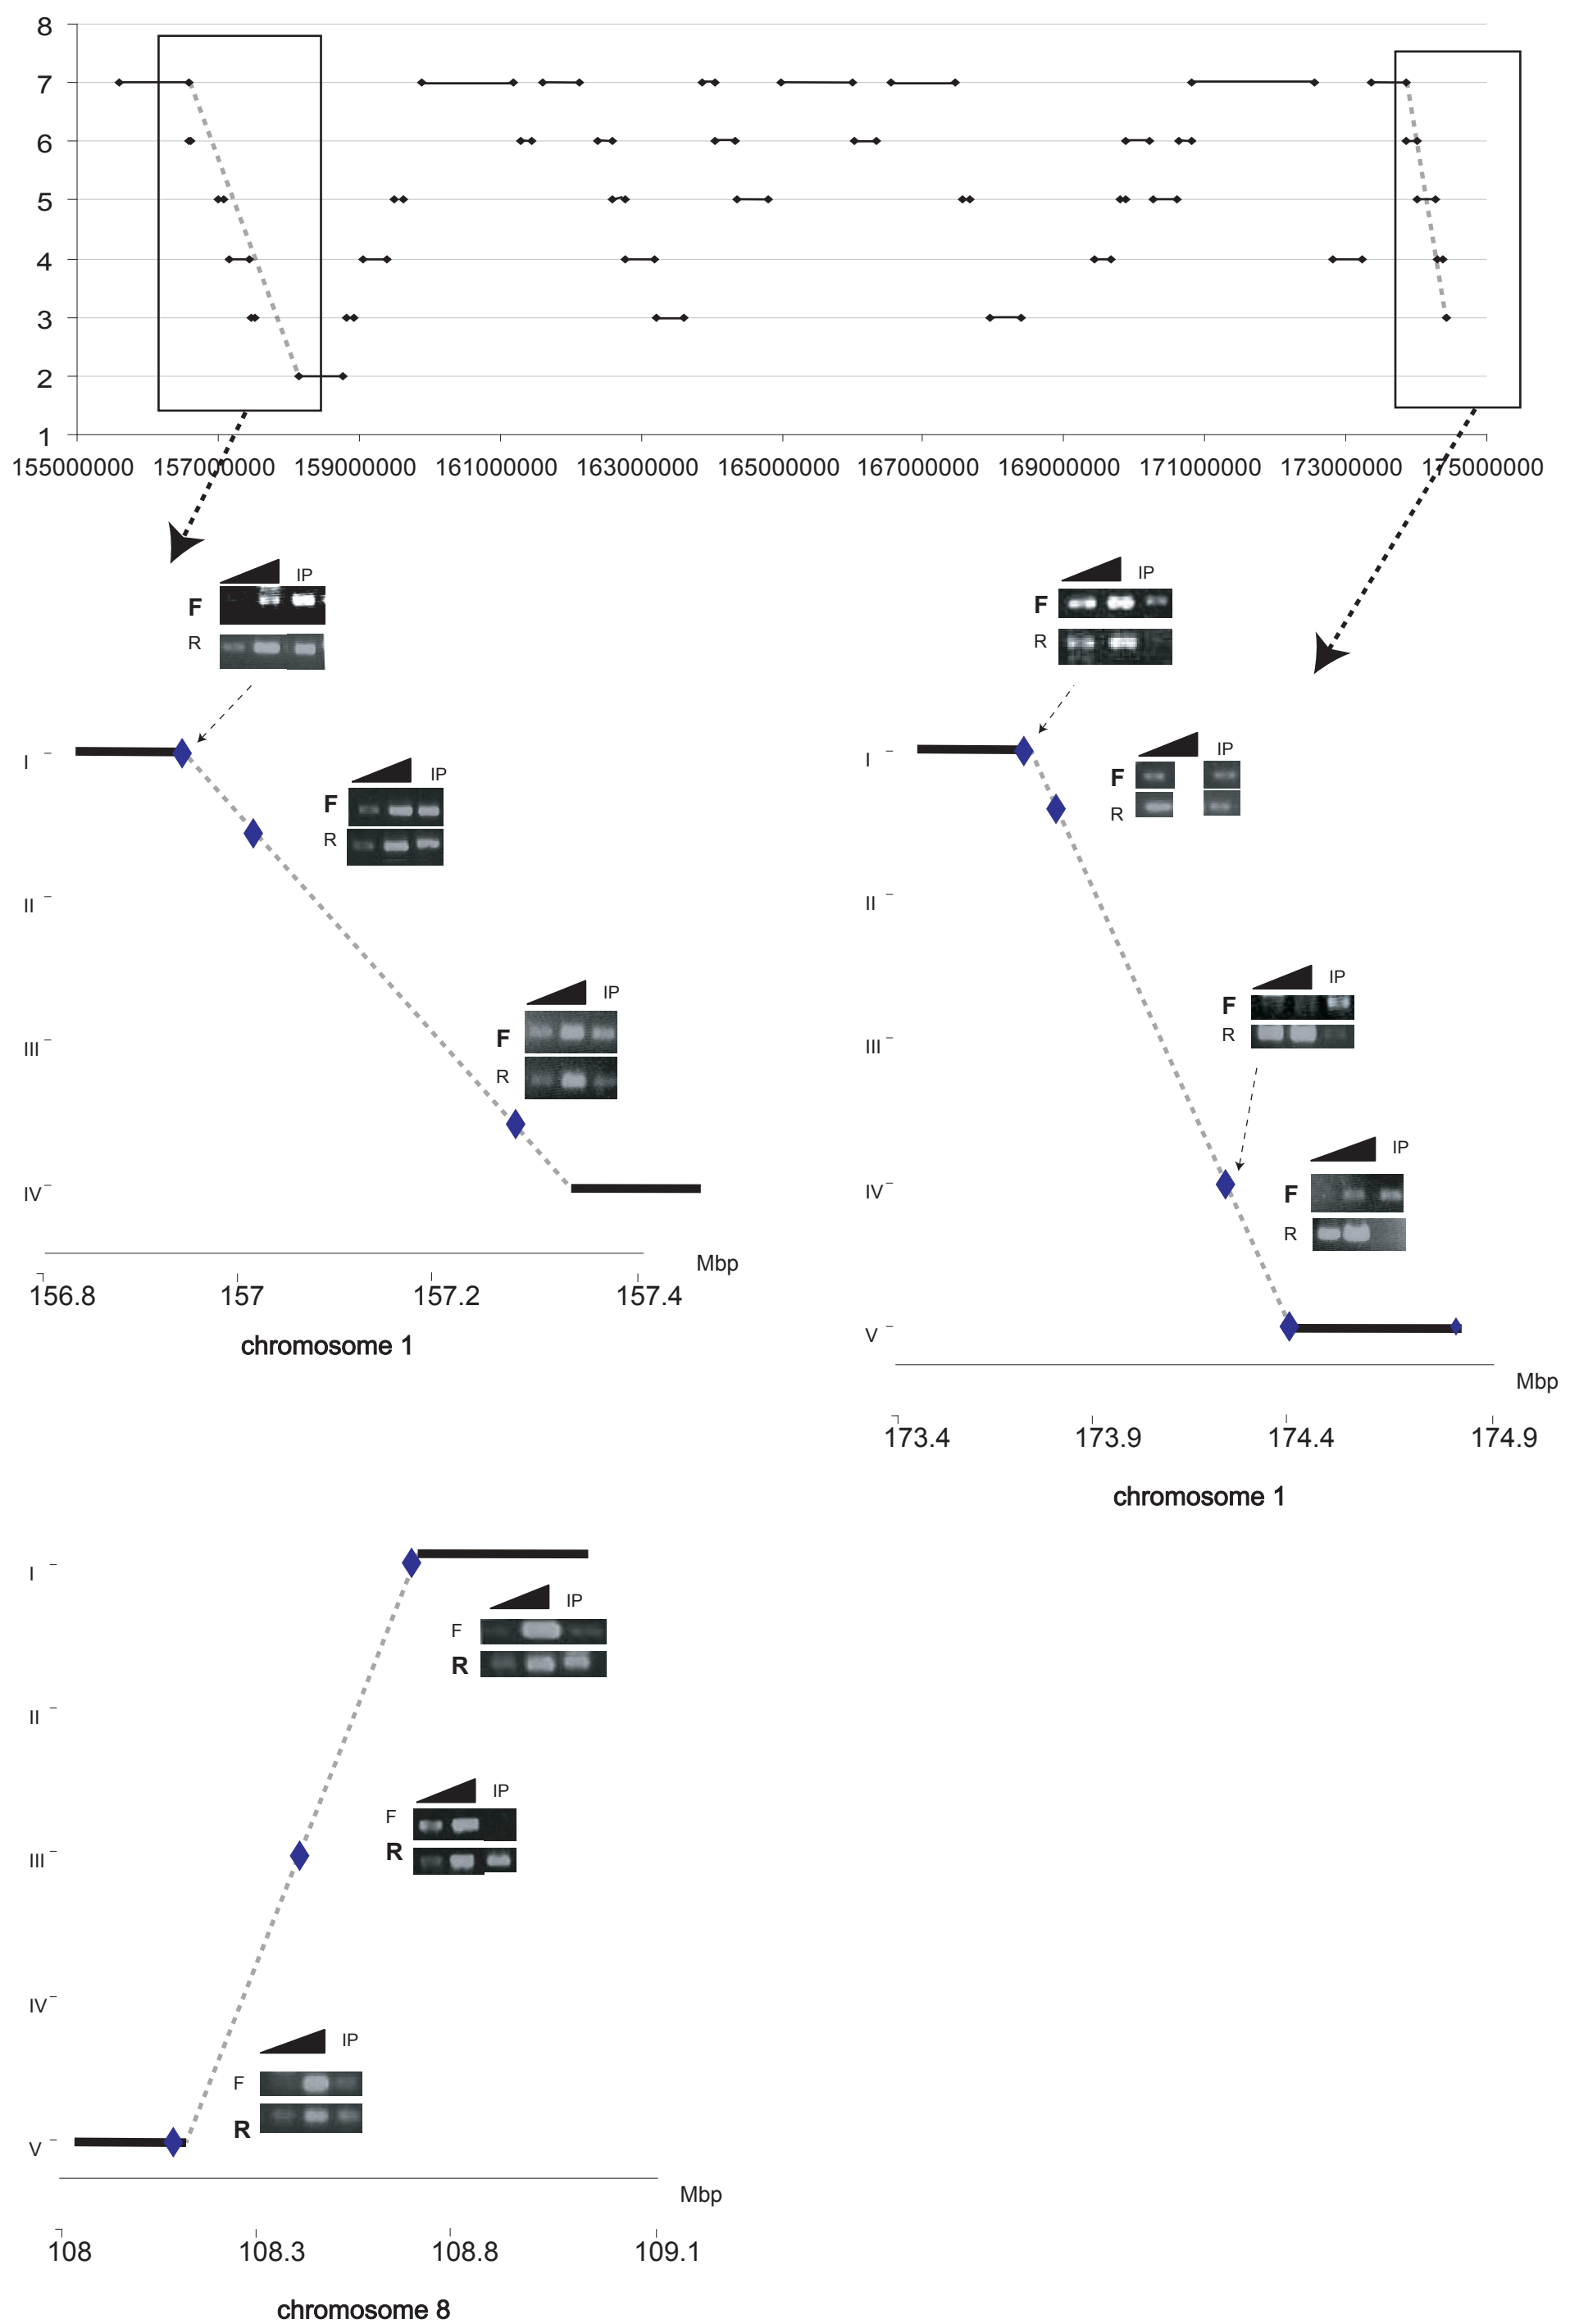

**Figure S10 Replication fork direction analysis.**

Three regions were analyzed for replication fork direction (using the method described in Fig4c). Note that all primer sets assayed in each region show the same direction of the fork (marked in bold letters) strongly suggesting that this entire region is replicated by a single fork.

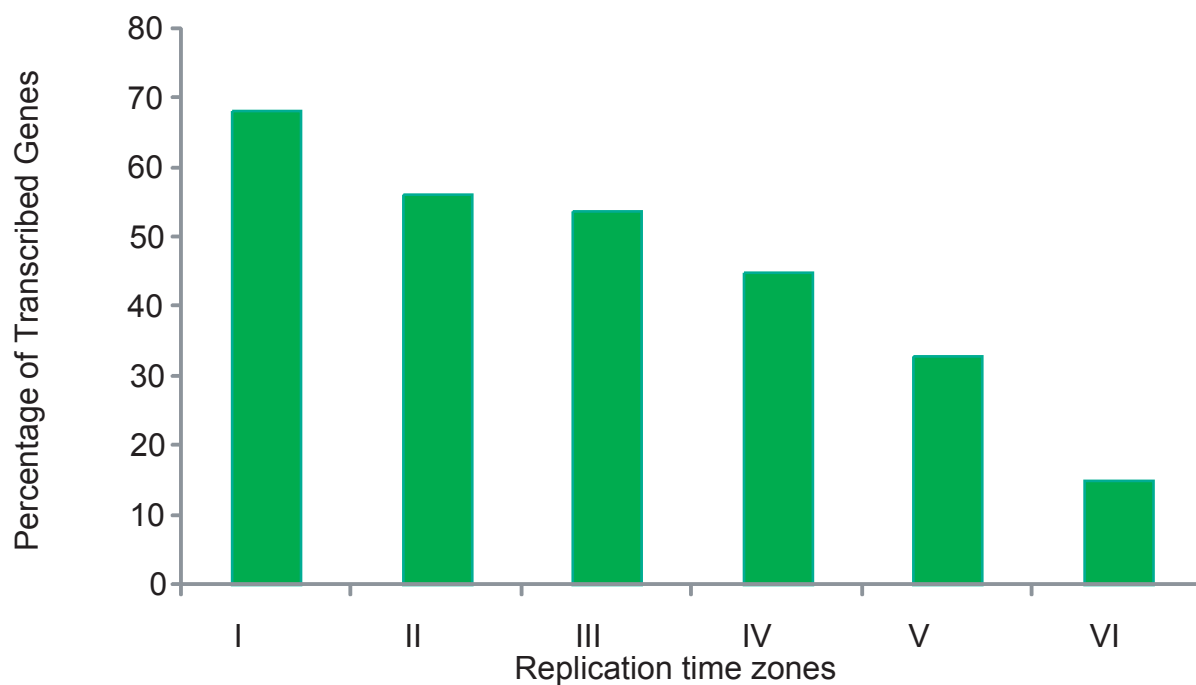

**Figure S11 Correlation between replication timing and transcription.**

The transcription levels of all genes in L1210 cells were measured using affymetrix 430A 2.0 microarray. The percentage of transcribed genes (annotated as present by the MAS5 algorithm) in each time of replication category is shown. Note that although there is a good correlation between early replication and transcription, the association is more complex, late genes can also be transcribed, whereas not all early genes are transcribed.

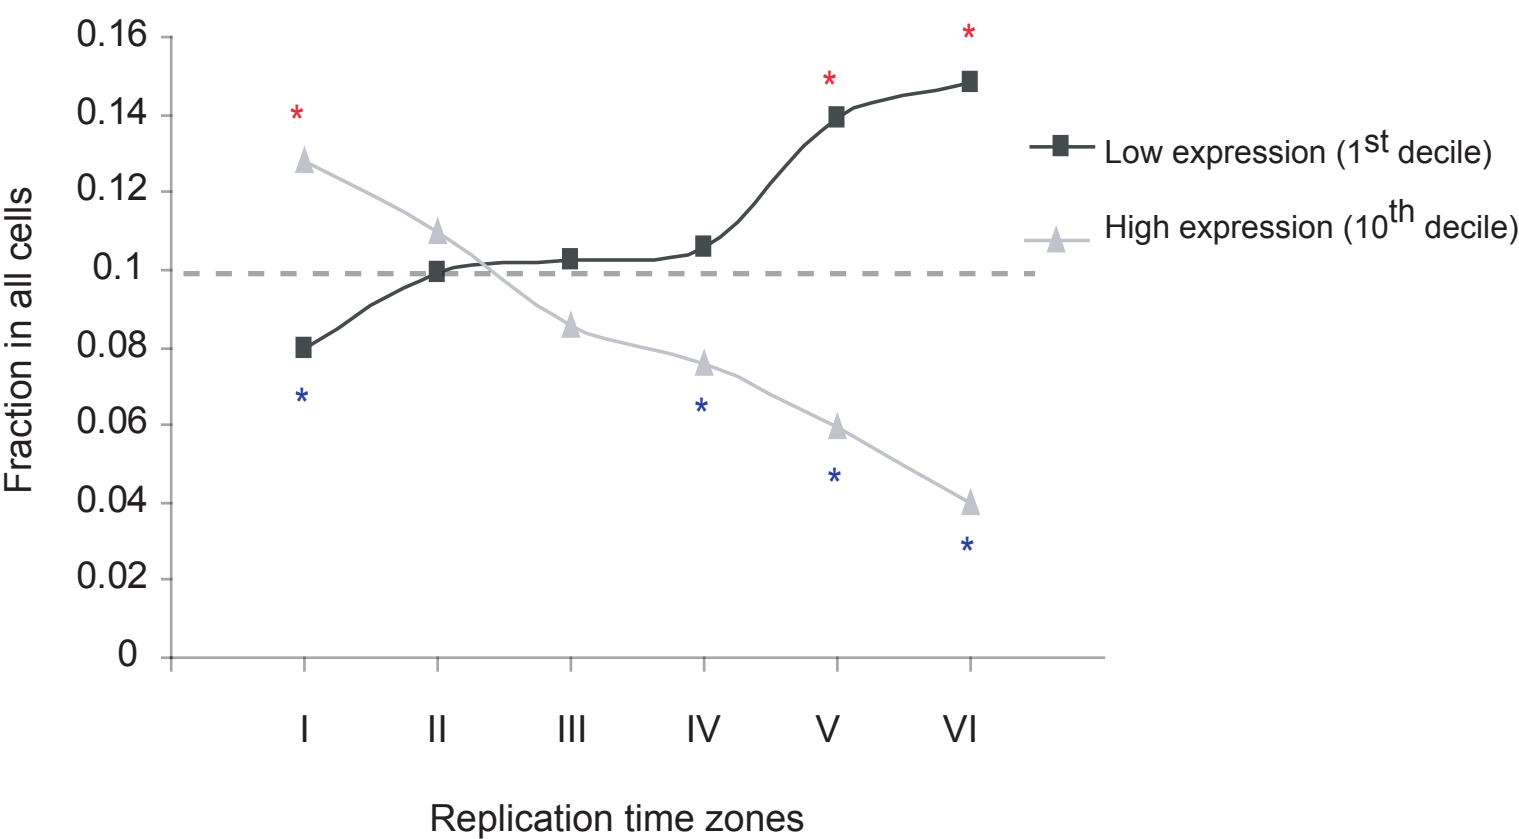

**Figure S12 Correspondence between replication timing and average transcript level**

The average expression data in 61 mouse tissues (Su et al., 2004) were divided into ten deciles. The percentage of genes in each replication time zone which fall into the 1st and 10th expression deciles is shown. Significant ( $P<0.0005$ ) enrichment or depletion over the expected value of 10% (dashed horizontal line) is marked by asterisks. Early clusters are enriched with highly expressed genes (10<sup>th</sup> decile) and depleted with low expressed genes (1<sup>st</sup> decile) while late clusters show the opposite pattern. Note that this correlation exists even though the expression levels are derived from a large variety of tissues and not from lymphocytes alone. This observation supports the idea that replication timing correlates with the transcription potential rather than with the actual transcription.

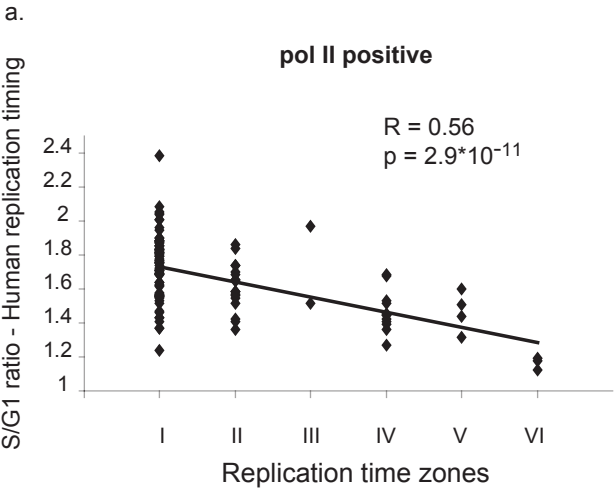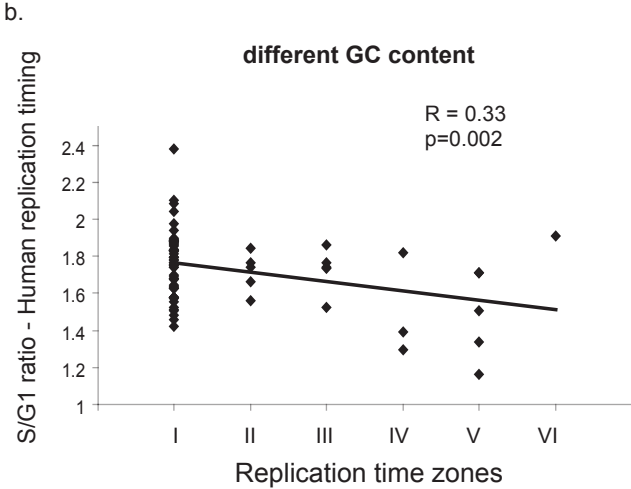

**Figure S13 Conservation in replication timing between human and mouse**

Correlation between human and mouse replication time was analyzed for genes which are expressed (a) and for genes that their GC content environment has changed between human and mouse (b). A change in the GC content environment was defined by ranking all the genes in each organism according to their GC content environment. Each ranked list was divided into three categories (high, middle and low GC content) each containing third of the genes. Genes that were assigned to different categories in the two organisms were defined as having a different GC content. The human replication time is shown as S:G1 ratio values (Woodfine et al., Human Molecular Genetics, 2004) in which higher values correspond to early replication. The regression line is shown together with its R and F statistics P values.



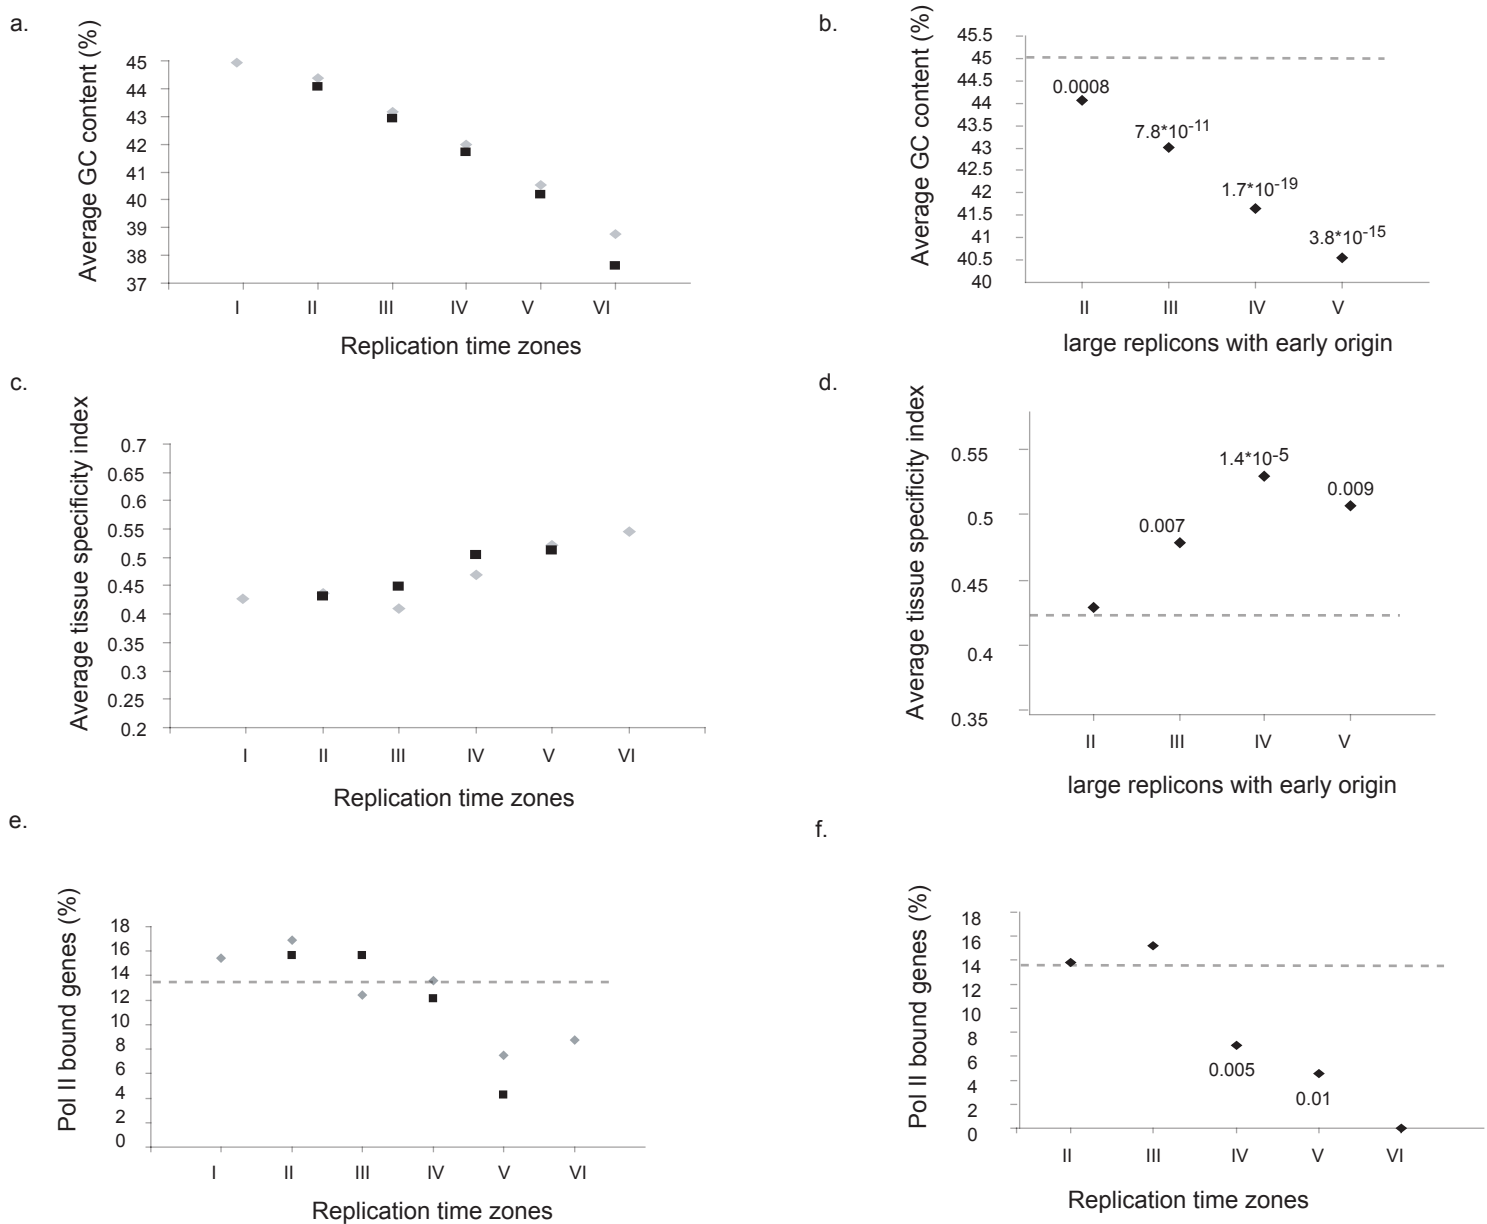

**Figure S14 Comparison between large replicons and replication time zones**

In order to compare the characters of regions that contain origins (grey diamonds in a,c,e) with regions in which replication occurs through the activation of distant origin (black squares in a,c,e), we divided the genome into large replicons and replication time zones. Note that an early replicating region must contain an origin (see methods). a. GC content in each replication time (I-VI) for the two types of replication organization. Note that the two patterns do not differ ( $p=0.26$ ; t test) from each other. b. Regions that their replication originates at cluster I (early S) were analyzed for the correlation between GC content and time of replication. The dashed line marks the GC content of early replicating regions (cluster I) and thus represents the expected results if the time of origin activation was in correlation with GC content. The average GC content in each point is significantly different from the GC content of the origin (dashed line; t test p values are shown). Moreover, the correlation between the ToR and the GC content exists also for these regions ( $R=0.28$ ,  $P<10^{-10}$ ). c. Average tissue specificity index in each replication time (I-VI). Again, the two patterns do not differ ( $p=0.39$ ; t test) from each other. d. Regions that their replication originates at cluster I (early S) were analyzed for the correlation between tissue specificity index and ToR. The average tissue specificity index for each point is significantly different from that of the origin (dashed line; t test p values are shown). Here also, the correlation between the time of replication and the tissue specificity index exists also for these regions ( $R=0.15$ ,  $P<10^{-3}$ ). e. The percentage of RNA Polymerase II bound genes in each replication time (I-VI). Note that the two patterns do not differ ( $p=0.45$ , t test) from each other. f. Regions that their replication originates at cluster I (early S) were analyzed for the correlation between RNA polymerase II binding and ToR. p-values (Fisher-exact test) are shown where the percentage of RNA polymerase II bound genes in the replication time zone is significantly different from that of the origin.

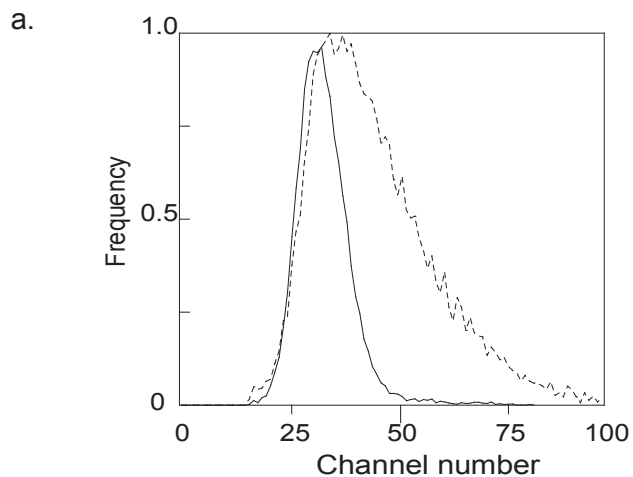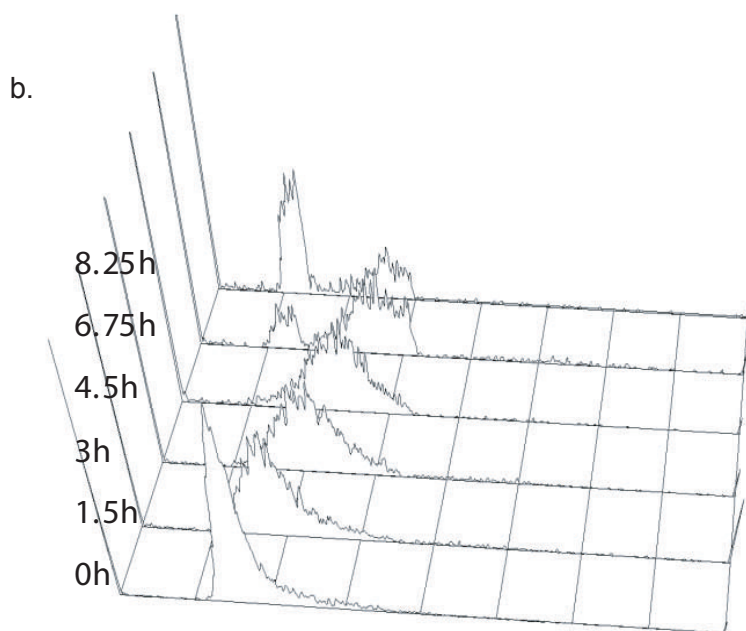

### Figure S15 baby machine synchronization

a. Synchronization of the cells isolated from the baby machine was assessed using a ZB Coulter electronic particle counter. The distributions of cell sizes of cells from unsynchronized culture (dashed line) and of newborn cells collected between 3 and 3.75 hours of elution from the baby machine (black line) are shown. Note that essentially all the newborn cells are small (low channel number). b. In order to further assess the synchrony and homogenous population of mitotic cells that were collected from the "Baby machine" samples of mitotic cells were collected for 45 minutes, incubated for the indicated times and analyzed with PI using flow cytometry. Note that the cells are collected at the beginning of the cell cycle (G1) and grow synchronously for about 8h.

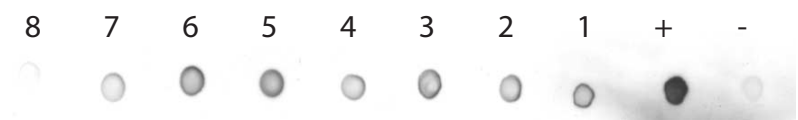

**Figure S16 Assessment of BrdU incorporation**

Assessment of the amount of BrdU incorporated in each sample was done using a dot blot based technique (see methods). Note that samples 1-6 in which the cells were exposed to the BrdU treatment during S phase (see figure 1a) contain similar amounts of BrdU (sample 7 contains low amount of BrdU since it represents cells exposed to BrdU very late in S phase and possible in early G2 phase). On the other hand sample 8 in which the cells were exposed to BrdU in the G2 phase contains almost no BrdU. The sample denoted by '+' is a positive control (10 hours labeling of BrdU) and the sample denoted by '-' is a negative control. Based on the low amount of BrdU incorporation in sample 8, it was excluded from further experiments. DNA from each sample was measured using the NanoDrop and equal amount of DNA was loaded for each sample.

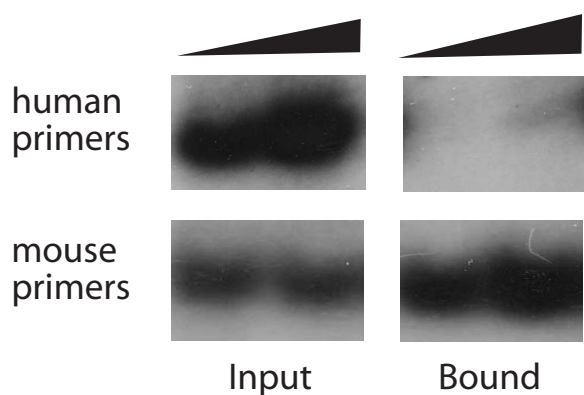

**Figure S17 Assessment of BrdU immunoprecipitation specificity.**  
The specificity of the immunoprecipitation was assessed by mixing BrdU labeled mouse DNA (from L1210 cells) with 6 fold excess of unlabeled human DNA (from K562 cells). After immunoprecipitation the amount of mouse and human DNA was measured by semi quantitative PCR using species specific primers (see primers table). Note that almost no human DNA was detected after the immunoprecipitation (bound) whereas in the input samples it was in excess.

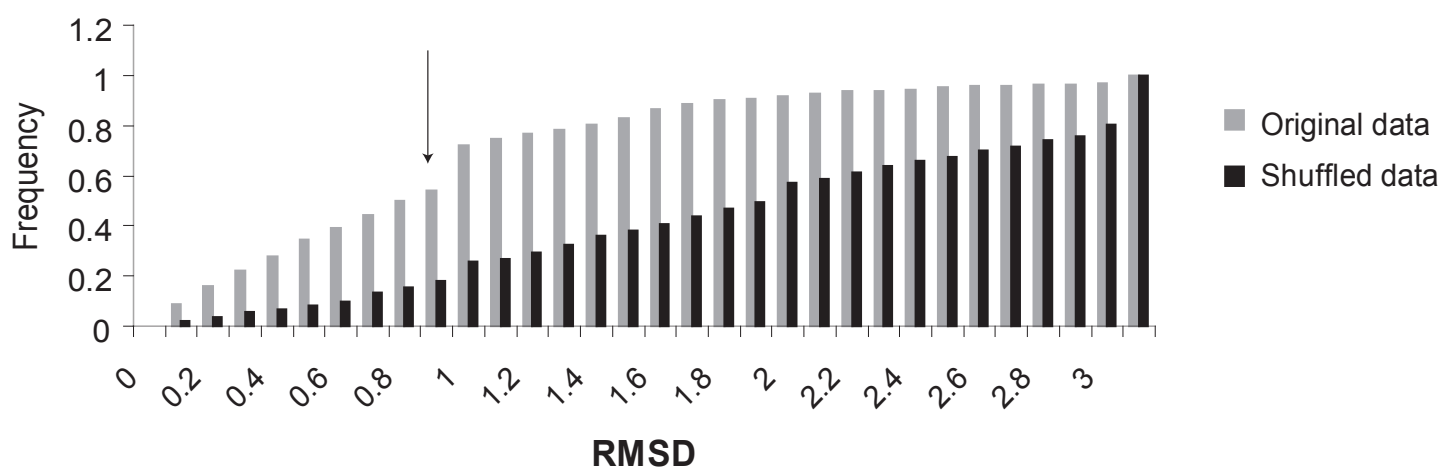

**Figure S18 Effect of shuffling the data on passive replication zones identification**  
 The root mean square deviation (RMSD) between the replication time of all the short (<250Kb) segments falling between two long segments and the predicted replication time (see figure 4a) was calculated. Cumulative histogram of the RMSD values is shown for the original (grey) and the shuffled (black) data. The arrow marks the threshold chosen for further analysis of passive replication zones (RMSD<1).Note that the RMSD values are lower in the original data than in the shuffled data. For example 54% of the passive zones have RMSD<1 in the original data whereas only 18% (3 fold enrichment) after shuffling.

## References

1. Thornton, M.; Eward, K. L.; Helmstetter, C. E., Production of minimally disturbed synchronous cultures of hematopoietic cells. *Biotechniques* **2002**, 32, (5), 1098-100, 1102, 1105.
2. Ueda, J.; Saito, H.; Watanabe, H.; Evers, B. M., Novel and quantitative DNA dot-blotting method for assessment of in vivo proliferation. *Am J Physiol Gastrointest Liver Physiol* **2005**, 288, (4), G842-7.
3. Azuara, V.; Brown, K. E.; Williams, R. R.; Webb, N.; Dillon, N.; Festenstein, R.; Buckle, V.; Merckenschlager, M.; Fisher, A. G., Heritable gene silencing in lymphocytes delays chromatid resolution without affecting the timing of DNA replication. *Nat Cell Biol* **2003**, 5, (7), 668-74.
4. Kitsberg, D.; Selig, S.; Brandeis, M.; Simon, I.; Keshet, I.; Driscoll, D. J.; Nicholls, R. D.; Cedar, H., Allele-specific replication timing of imprinted gene regions. *Nature* **1993**, 364, (6436), 459-63.
5. Selig, S.; Okumura, K.; Ward, D. C.; Cedar, H., Delineation of DNA replication time zones by fluorescence in situ hybridization. *Embo J* **1992**, 11, (3), 1217-25.
6. Goren, A.; Tabib, A.; Hecht, M.; Cedar, H., DNA replication timing of the human  $\beta$ -globin domain is controlled by histone modification at the origin. *Genes Dev* **2008**, 22, (10), 1319-24.
7. Lieb, J. D.; Liu, X.; Botstein, D.; Brown, P. O., Promoter-specific binding of Rap1 revealed by genome-wide maps of protein-DNA association. *Nat Genet* **2001**, 28, (4), 327-34.
8. Odom, D. T.; Zizlsperger, N.; Gordon, D. B.; Bell, G. W.; Rinaldi, N. J.; Murray, H. L.; Volkert, T. L.; Schreiber, J.; Rolfe, P. A.; Gifford, D. K.; Fraenkel, E.; Bell, G. I.; Young, R. A., Control of pancreas and liver gene expression by HNF transcription factors. *Science* **2004**, 303, (5662), 1378-81.
9. <http://cmgm.stanford.edu/pbrown/protocols/index.html>.
10. Yanai, I.; Benjamin, H.; Shmoish, M.; Chalifa-Caspi, V.; Shklar, M.; Ophir, R.; Bar-Even, A.; Horn-Saban, S.; Safran, M.; Domany, E.; Lancet, D.; Shmueli, O., Genome-wide midrange transcription profiles reveal expression level relationships in human tissue specification. *Bioinformatics* **2005**, 21, (5), 650-9.
11. Su, A. I.; Wiltshire, T.; Batalov, S.; Lapp, H.; Ching, K. A.; Block, D.; Zhang, J.; Soden, R.; Hayakawa, M.; Kreiman, G.; Cooke, M. P.; Walker, J. R.; Hogenesch, J. B., A gene atlas of the mouse and human protein-encoding transcriptomes. *Proc Natl Acad Sci U S A* **2004**, 101, (16), 6062-7.
12. Woodfine, K.; Fiegler, H.; Beare, D. M.; Collins, J. E.; McCann, O. T.; Young, B. D.; Debernardi, S.; Mott, R.; Dunham, I.; Carter, N. P., Replication timing of the human genome. *Hum Mol Genet* **2004**, 13, (2), 191-202.
13. Ernst, J.; Bar-Joseph, Z., STEM: a tool for the analysis of short time series gene expression data. *BMC Bioinformatics* **2006**, 7, 191.
14. Hatton, K. S.; Dhar, V.; Brown, E. H.; Iqbal, M. A.; Stuart, S.; Didamo, V. T.; Schildkraut, C. L., Replication program of active and inactive multigene families in mammalian cells. *Mol Cell Biol* **1988**, 8, (5), 2149-58.
15. Azuara, V.; Perry, P.; Sauer, S.; Spivakov, M.; Jorgensen, H. F.; John, R. M.; Gouti, M.; Casanova, M.; Warnes, G.; Merckenschlager, M.; Fisher, A. G., Chromatin signatures of pluripotent cell lines. *Nat Cell Biol* **2006**, 8, (5), 532-8.

16. Hiratani, I.; Leskovaar, A.; Gilbert, D. M., Differentiation-induced replication-timing changes are restricted to AT-rich/long interspersed nuclear element (LINE)-rich isochores. *Proc Natl Acad Sci U S A* **2004**, 101, (48), 16861-6.
